1     ***Bacillus safensis* FO-36b and *Bacillus pumilus* SAFR-032: A Whole Genome**  
2                     **Comparison of Two Spacecraft Assembly Facility Isolates**

3             **Madhan R Tirumalai<sup>1</sup>, Victor G. Stepanov<sup>1</sup>, Andrea Wünsche<sup>1</sup>, Saied Montazari<sup>1</sup>,**  
4                     **Racquel O. Gonzalez<sup>1</sup>, Kasturi Venkateswaran<sup>2</sup>, George. E. Fox<sup>1§</sup>**

5     <sup>1</sup>Department of Biology and Biochemistry, University of Houston, Houston, TX, 77204-5001.

6     <sup>2</sup> Biotechnology & Planetary Protection Group, NASA Jet Propulsion Laboratories, California  
7     Institute of Technology, Pasadena, CA, 91109.

8  
9     <sup>§</sup>Corresponding author:

10             Dr. George E. Fox

11             Dept. Biology & Biochemistry

12             University of Houston, Houston, TX 77204-5001

13             713-743-8363; 713-743-8351 (FAX); email: fox@uh.edu

14  
15     Email addresses:

16     MRT: mrtirum2@central.uh.edu

17     VGS: vstepano@central.uh.edu

18     AW: andrea.wunsche@gmail.com

19     SM: montazaris@gmail.com

20     ROG: raquel.gonzalez100@yahoo.com

21     KV: kasthuri.j.venkateswaran@jpl.nasa.gov

22     GEF: fox@uh.edu

23 **Keywords:** Planetary protection, *Bacillus* endospores, extreme radiation resistance, peroxide  
24 resistance, genome comparison, phage insertions

25

## 26 **Background**

27 Microbial persistence in built environments such as spacecraft cleanroom facilities [1-3] is often  
28 characterized by their unusual resistances to different physical and chemical factors [1, 4-7].  
29 Consistently stringent cleanroom protocols under planetary protection guidelines over several  
30 decades [1, 8-12], have created a special habitat for multi-resistant bacteria, many of which have  
31 been isolated and identified [13-19]. The potential of many of these isolates to possibly survive  
32 interplanetary transfer [2, 20-24] raises concern of potential forward and backward bacterial  
33 contamination. Understanding the survival mechanisms employed by these organisms is the key  
34 to controlling their impact on exobiology missions. In addition, their occurrence in the closed  
35 environments of the International Space Station, (ISS), could possibly impact the living  
36 conditions there as well [1-3, 25-27].

37 Two of the most studied organisms in the specialized niches of spacecraft assembly  
38 facilities and the ISS are *B. safensis* FO-36b<sup>T</sup> [28] (referred to as FO-36b henceforth) and *B.*  
39 *pumilus* SAFR-032 [16] (referred to as SAFR-032). These organisms are representative strains of  
40 the endospore producing *Bacillus* sp.[13, 16, 29-33]. Both strains produce spores that exhibit  
41 unusual levels of resistance to peroxide and UV radiation [24, 29, 34] that far exceed that of the  
42 dosimetric *B. subtilis* type strain (*B. subtilis subsp. subtilis str.* 168, referred to as BSU) [35]. A  
43 third strain, *B. safensis* MERTA-8-2 (referred to as MERTA), was initially isolated from the  
44 Mars Odyssey Spacecraft and associated facilities at the Jet Propulsion Laboratory and later also  
45 found on the Mars Explorer Rover (MER) before its launch in 2004. It has been reported that this

46 strain actually grows better on the ISS than on Earth [36]. However, the resistance properties of  
47 its spores have not been directly tested. A recent phylogenetic study of 24 *B. pumilus* and *B.*  
48 *safensis* strains, found FO-36b, and MERTA clustered together in a distinct group of *B. safensis*  
49 strains [37].

50 Previously a draft genome of FO-36b with as many as 408 contigs  
51 (<https://www.hgsc.bcm.edu/microbiome/bacillus-pumilus-f036b>) was compared to SAFR-032  
52 and the type strain *B. pumilus* ATCC7061<sup>T</sup> [38, 39] (referred to as ATCC7061). This comparison  
53 identified several genes and a mobile genetic element in SAFR-032 that may be associated with  
54 the elevated resistance [39]. Since this previous study was completed, minor corrections to the  
55 SAFR-032 gene order were made and the annotation was updated [40]. In addition, a draft  
56 genome of MERTA was reported [41]. Herein, we now report a complete genomic sequence for  
57 FO-36b and the results of a detailed comparison of these four genomes.

## 58 **Methods**

### 59 **Sequencing of the *Bacillus safensis* FO-36b genome.**

60 5µg of purified genomic DNA of FO-36b was digested with NEBNext dsDNA Fragmentase  
61 (New England Biolabs, Ipswich, MA) yielding dsDNA fragments in a size range of 50 bp up to  
62 1000 bp. The fragments were fractionated on a 2% agarose gel, and those with the length from  
63 300 bp to 350 bp were isolated as described [42]. The dsDNA fragments were converted to a  
64 shotgun DNA library using the TruSeq PCR-Free DNA Sample Preparation Kit LT (Illumina,  
65 San Diego, CA) according to the manufacturer's instructions. Sequencing was performed on the  
66 Illumina HiSeq 2500 sequencer at the University of Arizona Genetic Core Facility (Tucson, AZ).  
67 A total of 10,812,117 pairs of 100 base-long reads with average Phred quality of 34.92/base were  
68 collected. The reads were processed with Sickle 1.33 [43] and Trimmomatic 0.32 [44] was used

69 to remove seven 3'-terminal low-quality bases, and to filter out the reads with average Phred  
70 quality below 16/base as well as reads containing unidentified nucleotides. Overall, 9,047,105  
71 read pairs and 1,435,623 orphaned single reads with a total of 1,816,274,469 nucleotides were  
72 retained after the filtration step. The reads were assembled using the Abyss 1.5.2 *de novo*  
73 assembler [45] with the *kmer* parameter set at 64. The assembly consisted of 22 contigs with a  
74 total length of 3,753,329 bp. The average contig length was 170,605 bp (ranging from 352 to  
75 991,464 bp), with an N50 contig length equal to 901,865 bp. Data from two previous FO-36b  
76 draft genomes (<https://www.hgsc.bcm.edu/microbiome/bacillus-pumilus-f036b>; and  
77 <https://www.ncbi.nlm.nih.gov/biosample/SAMN02746691>) did not provide the additional  
78 information needed to order the 22 remaining contigs.

79 Instead, connections between the contigs were obtained by systematic PCR screening  
80 using LongAmp *Taq* DNA polymerase (New England Biolabs, Ipswich, MA) and near-terminal  
81 outward-facing primers. The amplicons were gel purified and sequenced by the Sanger method at  
82 SeqWright, Inc (Houston, TX). This allowed closure of all the gaps between the contigs. The  
83 complete FO-36b genome sequence comprises 3.77 Mb and has G+C content of 41.74%.

84

### 85 ***B. safensis* FO-36b genome annotation**

86 The FO-36b genome was annotated using the NCBI's Prokaryotic Genome Annotation Pipeline  
87 [46]. 3850 ORFs and 40 non-coding RNAs and riboswitches were predicted and the results were  
88 deposited in Genbank under accession number CP010405.

89

90

91

## 92 **Genomes used in comparisons**

93 The recently updated complete sequence of the SAFR-032 genome was obtained from NCBI  
94 (CP000813.4). The draft genomes of ATCC7061<sup>T</sup> (Refseq accession no:  
95 NZ\_ABRX00000000.1), consisting of 16 contigs and MERTA consisting of 14 contigs (Refseq  
96 accession no: GCF\_000972825.1) were obtained from the public databases of the National  
97 Center for Biotechnology Information (NCBI). Several additional *B. safensis* and *B. pumilus*  
98 draft genomes from various sources have also been deposited in the NCBI database in recent  
99 years. However, these genomes get excluded when performing a global Genbank Blast (NT)  
100 analysis. To avoid this potential problem, these additional draft genomes were separately  
101 retrieved from the Genbank repository (*B. pumilus* genomes,  
102 <https://www.ncbi.nlm.nih.gov/genome/genomes/440>; *B. safensis* genomes,  
103 <https://www.ncbi.nlm.nih.gov/genome/genomes/13476>) and locally integrated into the Genbank  
104 NT database. The resulting local database allowed inclusion of these genomes in subsequent  
105 Blast (NT) studies. Overall, the analysis involved 65 *B. pumilus* and *B. safensis* genomes  
106 (including the FO-36b, MERTA, SAFR-032 and ATCC7061 genomes). The names of the  
107 genomes used are given in Additional file 1: Table S1

108

## 109 **BLAST studies**

110 Individual gene and protein sequences from the FO-36b genome, were blasted against each other  
111 as well as against the genomes of SAFR-032, MERTA and ATCC7061 using the standalone  
112 version of NCBI's BLAST program [47]. The comprehensive search included blastN and blastX  
113 for the nucleotide sequences and blastP for the protein sequences. Additionally, global blast was  
114 performed on the sequences against the updated NR/NT databases downloaded from the NCBI

115 on the Opuntia Cluster at the Center of Advanced Computing and Data Systems at the University  
116 of Houston.

117 Genes with BLAST results in which the best hit had an e-value greater than (an arbitrary)  
118 0.0001 were considered absent from the target genome, while those with BLAST e-values below  
119 e-10 were considered to be matches. Genes with e-values between e-20 and 0.0001 were further  
120 analyzed by aligning the sequence of the entire gene neighborhood with the corresponding  
121 region in the other genomes to ascertain/verify the BLAST results as well as to look for unusual  
122 features in the sequence. Gene/protein sequence alignments were performed using Bioedit  
123 (<http://www.mbio.ncsu.edu/BioEdit/bioedit.html>).

124

#### 125 **Phage analysis**

126 The online tool PHAST [48, 49] was used to predict and annotate potential phage elements in the  
127 genomes. Comparative analysis of the respective homologs on the other genomes, were  
128 performed to map the respective corresponding phage regions on the other genomes.

129

#### 130 **Whole Genome Phylogenetic Analysis (WGPA) and Genome-Genome Distance Studies** 131 **(GGDC)**

132 In order to obtain an overall view of relationships among the various genomes, we used seven  
133 additional genomes thereby forming a complete set of 72 strains. Overall, the genomes included  
134 65 *B. pumilus* and *B. safensis* genomes (including those of FO-36b, MERTA, SAFR-032 and  
135 ATCC7061), four representative strains from the *B. altitudinis* complex, viz., *B. aerophilus*  
136 *C772*, *B. altitudinis* 41KF2b, *B. cellulasensis* NIO-1130(T), and, *B. stratosphericus* LAMA 585.

137 The genomes of *Geobacillus kaustophilus*, and *B. subtilis* served as outliers in the *Firmicutes*  
138 group, while the genome of Gram-negative *E. coli* MG1655, served as a non-*Firmicutes* outlier.

139 A whole-genome-based phylogenetic analysis was conducted using the latest version of  
140 the Genome-BLAST Distance Phylogeny (GBDP) method [50] as previously described [51].  
141 Briefly, BLAST+ [52] was used as a local alignment tool and distance calculations were done  
142 under recommended settings (greedy-with-trimming algorithm, formula D5, e-value filter 10e-8).  
143 100 pseudo-bootstrap replicates were assessed under the same settings each. Finally, a balanced  
144 minimum evolution tree was inferred using FastME v2.1.4 with SPR post processing [53].  
145 Replicate trees were reconstructed in the same way and branch support was subsequently  
146 mapped onto the tree. The final tree was rooted at the midpoint [54]. The genomes were also  
147 compared using the in-silico genome-to-genome comparison method, for genome-based species  
148 delineation and genome-based subspecies delineation based on intergenomic distance calculation  
149 [50, 55].

150 In order to confirm the reasonableness of these results, a separate analysis was conducted  
151 using DNA gyrase A (*gyrA*), which has often been used for single gene phylogenetic studies [28,  
152 56-60]. *gyrA* is preferable to 16S rRNA in this case, because many of the 16S rRNAs are too  
153 similar [61].

154 The *gyrA* sequences were bioinformatically isolated from all 72 genomes and aligned  
155 using Bioedit (<http://www.mbio.ncsu.edu/BioEdit/bioedit.html>), ClustalW, and MEGA [62, 63]  
156 with MUSCLE. Maximum Likelihood, Neighbor-Joining and Minimum Evolution trees were  
157 built using MEGA. The Maximum Likelihood tree was built using the Tamura-Nei model [64].  
158 The tree with the highest log likelihood (-18473.7156) was used. Initial tree(s) for the heuristic  
159 search were obtained automatically by applying the Neighbor-Join and BioNJ algorithms to a

160 matrix of pairwise distances estimated using the Maximum Composite Likelihood (MCL)  
161 approach. The topology with superior log likelihood value was selected.

162 A Minimum Evolution (ME) Tree was built using the method described by Rzhetsky and  
163 Nei (1992) [65]. The ME tree was searched using the Close-Neighbor-Interchange (CNI)  
164 algorithm [66] at a search level of 1. The Neighbor-Joining (NJ) Tree was built using the method  
165 described by Saitou and Nei (1987) [67].

166 For both the ME and NJ trees, the optimal tree(s) with the sum of branch length =  
167 1.62873358 was derived. The evolutionary distances were computed using the Maximum  
168 Composite Likelihood method [68] and are in the units of the number of base substitutions per  
169 site.

170 The analysis involved 72 nucleotide sequences. Codon positions included were  
171 1st+2nd+3rd+Noncoding. All positions containing gaps and missing data were eliminated. There  
172 were a total of 2424 positions in the final dataset. Evolutionary analyses were conducted in  
173 MEGA6 [69].

174 The Mauve alignment [70] program was used to align the previous draft FO-36b  
175 sequence (GCA\_000691165.1 / ASJD000000000) with the current updated sequence (CP010405).

176

### 177 **Screening Genomes for Antibiotic resistance genes.**

178 A global analysis of each of the four genomes was performed to identify possible antibiotic  
179 resistance loci. This was done using the reference sequences of the Comprehensive Antibiotic  
180 Resistance Database ("CARD") [71], In addition a search for potential 'resistome(s)' was  
181 undertaken using the Resistance Gene Identifier feature of the CARD database for the four  
182 genomes.



## 183 **Results**

### 184 **Unique and characteristic genes**

185 Genes are considered to be characteristic if they are present in FO-36b, but absent in the other  
186 three organisms examined here. Unique genes are those that are not only absent in the other  
187 three genomes, but have not yet been found in any other genome. 307 ORFs found in FO-36b are  
188 not shared by SAFR-032. Sixty five of these ORFs did not have homologs in the genomes of  
189 ATCC7061 or MERTA and are therefore considered characteristic (Table 1). Although most are  
190 open reading frames that code for hypothetical proteins, six genes suggest that FO-36b has a  
191 CRISPR system. The likely presence of a CRISPR system is shared by 5 other *B. safensis*  
192 genomes and 8 other *B. pumilus* genomes (Additional file 2: Table S2). Among the 49  
193 hypothetical protein coding ORFs, 26 are predicted to be part of phage element(s).

194 The analysis was extended to all available genomes of *B. safensis*  
195 (<https://www.ncbi.nlm.nih.gov/genome/genomes/13476>) and *B. pumilus*  
196 (<https://www.ncbi.nlm.nih.gov/genome/genomes/440>). Nine ORFs/genes classified as FO-36b  
197 characteristic are absent from all the *B. safensis* and *B. pumilus* genomes available in the NCBI  
198 database. These nine genes are totally unique to FO-36b with no homologs in the entire NR/NT  
199 databases (Table 2). Four of these are part of predicted phage elements. In addition, there are  
200 four genes with fewer than five homologs found in other *B. pumilus*/*B. safensis* genomes (Table  
201 3). Overall 217 SAFR-032 ORFs are not shared by *B. safensis* FO-36b. Sixty three of the 65 FO-  
202 36b characteristic ORFs are absent in 28 of the 61 total *B. safensis*, *B. pumilus*, and *Bacillus sp.*  
203 WP8 genomes. 18 are absent in all the *B. safensis* genomes, while 15 are not found in any of the  
204 *B. pumilus* genomes (Additional file 3: Table S3).

205

## 206 **Phage insertions**

207 The genome of FO-36b contains two phage insertions, namely the *Bacillus* bacteriophage SPP1  
208 (NC\_004166.2) insertion and the *Brevibacillus* phage Jimmer 1 (NC\_029104.1) insertion. The  
209 SPP1 insertion, (Figure 1), consists of 62 genes (RS87\_02955 to RS87\_03255). Abbreviated  
210 versions are found in the MERTA strain (4 genes) and the ATCC7061 strain (3 genes), (Figure 1  
211 and Figure 2). Portions of this element can also be detected in other *B. safensis*/*B. pumilus*  
212 strains by sequence comparison.

213 The *Brevibacillus* phage Jimmer 1 (NC\_029104.1) insertion is found to some extent in all  
214 60 draft genomes belonging to the *B. safensis*/*B. pumilus* family and the one *Bacillus sp* WP8. In  
215 the FO-36b genome, this phage element contains 94 genes (RS87\_14155 to RS87\_14625). The  
216 entire stretch of this insertion can be divided into three blocks, block A (30 genes, RS87\_14155  
217 to RS87\_14305), block B (30 genes, RS87\_14310 to RS87\_14455) and block C (34 genes,  
218 RS87\_14460 to RS87\_14625). A major chunk of block C (26 genes RS87\_14460 to  
219 RS87\_14590) is a duplication of block A. The overall scheme of this unique duplication within  
220 the insertion is given in Figure 3.

221 A similar version of the Jimmer-1 phage region is found in the non-resistant ATCC7061  
222 (Figure 4). In this case, the block A like region is comprised of 32 ORFs (30 genes and 2  
223 pseudogenes, BAT\_0021 to BAT\_0052). The block C analog is formed from a cluster of 32  
224 ORFs (29 genes and 3 pseudogenes, BAT\_0175 to BAT\_0206). Finally, a total of 42 ORFs (41  
225 genes and 1 pseudogene, BAT\_0053 to BAT\_0094) comprise the equivalent of Block B from  
226 FO-36b (Figure 4).

227 The MERTA and SAFR-032 strains show equivalent regions of block A and block C  
228 from FO-36b. However, both block B and the duplication of the block A equivalent region are

229 missing in these strains (Figure 5 and Figure 6). The genome of the non-resistant spore  
230 producing BSU strain contains the block A and block C equivalents in stretches of 28  
231 ORFs/genes (BSU12810 to BSU12580) and 30 ORFs/genes (BSU12810 to BSU12560)  
232 respectively, while block B is entirely missing. However, a major chunk of block A  
233 (RS87\_14200 to RS87\_14300) equivalent region in BSU is duplicated in a stretch of 20  
234 ORFs/genes (BSU25980 to BSU26190) (Figure 7). In general, the occurrence of phage insertion  
235 regions and genes therein such as the dUTPase and RecT genes do not appear to be strongly  
236 correlated with resistance properties.

237

#### 238 **Genes Shared by FO-36b, SAFR-032, and MERTA but missing in ATCC7061**

239 We had earlier reported that a total of 65 genes that were shared by SAFR-032 and FO-36b, were  
240 not found in the ATCC7061 strain [38]. Because they correlate with the presence or absence of  
241 resistance, these genes are of potential interest. A re-analysis of this list of genes extending to  
242 the MERTA strain showed that 59 of these genes are indeed shared by the MERTA strain as well  
243 (Additional file 4: Table S4). All of these genes are shared by at least several of the available 61  
244 *B. pumilus*, *B. safensis* and *Bacillis sp.* WP8 draft genomes. However, since the resistance  
245 properties of these organisms have typically not been examined, it is not immediately possible to  
246 determine if the correlation can be extended to these strains.

247

#### 248 **Antibiotic Resistance loci in the genomes**

249 The four genomes showed vast differences in the number of antibiotic resistance related  
250 mutations that were identified by the CARD [71] search. FO-36b, SAFR-032, MERTA and  
251 ATCC7061 had 670, 587, 317, and 495 mutations respectively. BSU comparatively had 861

252 such mutations. All the four genomes share “*cat86*”, which is a chromosome-encoded variant of  
253 the *cat* gene found in *Bacillus pumilus* [72], belonging to the AMR (antimicrobial resistance)  
254 gene family of chloramphenicol acetyltransferase (CAT).

## 255 **Phylogenetic analysis**

256 Previous efforts to define the phylogenetic relationship between various *B. safensis* and *B.*  
257 *pumilus* strains relied on 24 genomes including the unpublished draft sequence (ASJD00000000)  
258 of *B. safensis*. Comparing this earlier version with our updated corrected sequence assembly  
259 using Mauve shows our version differs considerably (Additional file 5: Figure S1). Given this  
260 and the large number of additional draft genomes, it was concluded that a re-analysis would be  
261 appropriate. Whole Genome Phylogenetic Analysis and Genome-genome distance analysis were  
262 used to examine relationships among the strains. The results of the WGPA are shown in Figure  
263 8, while the GGDC results are given in Additional file 1: Table S1. The phylogenetic trees are  
264 consistent with the earlier work (38). Two large clusters are seen. The first consists primarily of  
265 strains of *B. pumilus* with no *B. safensis* strains included. The first major cluster is itself broken  
266 into two large sub clusters, the first one of which includes both SAFR-032 and ATCC7061. The  
267 second sub cluster includes strains from the *B. altitudinis* complex  
268 (<https://www.ncbi.nlm.nih.gov/Taxonomy/Browser/wwwtax.cgi?id=1792192>), as well as other  
269 strains recently reported to be *B. pumilus*. The second major cluster consists primarily of *B.*  
270 *safensis* isolates but does include several likely misnamed *B. pumilus* strains too. This latter  
271 cluster includes both the FO-36b and the MERTA8-2 strains.

272 To further ascertain this observation, a maximum likelihood tree was obtained for the  
273 gene *gyrA* (Figure 9), which further supports the WGPA and GGDC analysis. Alternative tree

274 constructions of *gyrA* are provided as Additional file 6: Figure S2 and Additional file 7: Figure  
275 S3.

## 276 **Discussion**

277 If there is a single group of genes accounting for the elevated spore resistances seen in various  
278 strains of *B. pumilus* and *B. safensis* then the relevant genes should be shared by all three strains  
279 examined here but absent in the type strain. The fact that the extent of resistance and type of  
280 resistance (radiation, desiccation etc.) varies suggests there may not be a single set of genes  
281 involved. In any event, the distinctions in resistance seen may occur due to regulatory differences  
282 resulting in key genes associated with resistance being expressed at different levels or for  
283 different times [73-75]. Although not correlated with resistance information, it is of interest that  
284 in FO-36b, there is a dUTPase and a DNA recombinase gene included in the *Bacillus*  
285 bacteriophage SPP1 (NC\_004166.2) homologous region.

286

## 287 **Phage insertions**

288 Conjugative elements and phage-mediated insertions play major roles in the evolution of bacteria  
289 [76] by contributing to the genetic variability between closely related bacterial strains[77]. Such  
290 variability is often implicated in the phenotypical differences such as bacterial pathogenesis [77-  
291 80]. Bacteriophage-mediated horizontal gene transfer enhances bacterial adaptive responses to  
292 environmental changes such as the rapid spread of antibiotic resistance [81]. Furthermore,  
293 phages mediate inversions, deletions and chromosomal rearrangements, which help shunt genes  
294 that could directly impact the phenotype between related strains [77] or between  
295 phylogenetically distant strains via horizontal gene transfer (HGT)[82]. All of these evolutionary  
296 events have implications for selection and fitness.

297           The first phage insertion in FO-36b is homologous to the *Bacillus* bacteriophage SPP1.  
298   The SPP1 is a 44-kb virulent *Bacillus subtilis* phage, well-known for its ability to mediate  
299   generalized transduction, a widespread mechanism for the transfer of any gene from one  
300   bacterium to another [83]. The second insertion is homologous to *Brevibacillus* phage Jimmer 1,  
301   which is one of several myoviruses that specifically target *Paenibacillus larvae*, a *Firmicute*  
302   bacterium, as a host [84].

303           The *B. safensis* strain lacks the ICEBs1-like element that was previously found in SAFR-  
304   032 and as an incomplete analog in ATCC7061 [39]. As reported earlier [39], the ICEBs1-like  
305   element does harbor some SAFR-032 unique genes and thus, their presence was suggested as  
306   being possibly responsible for the resistance properties of SAFR-032. The absence of the  
307   ICEBs1-like element in the FO-36b genome suggests that this may not be the case. FO-36b has  
308   an established phenotype showing spore resistance to peroxide exceeding that of the other JPL-  
309   CRF isolates [13]. SAFR-032 spores have been demonstrated to show resistance to UV radiation  
310   exceeding that of the other JPL-CRF isolates [16]. Given that both FO-36b and SAFR-032  
311   harbor genes unique to each of them, on their respective phage elements (the two insertion  
312   elements in the case of FO-36b that are reported here and the ICEBs1-like element in the case of  
313   SAFR-032), a role of these unique genes in their respective unique spore phenotypes cannot be  
314   entirely ruled out.

315           Furthermore, more than one-half of the *in silico* predicted phage gene products are  
316   hypothetical proteins without any assigned functions [85-89]. Comparative genomic approaches  
317   use closely related phages from different host organisms and exploit the modular organization of  
318   phage genomes [90]. However, these methods are not adequate to address the hypothetical

319 protein coding ORFs that are unique to phage insertions found in a given microbial strain that  
320 displays unique phenotypes as in the case of FO-36b and SAFR-032.

321 Hypothetical phage proteins are considered potential candidates for bacterial detection  
322 and antimicrobial target selection. In recent times, efforts towards discovering phage-based  
323 antimicrobials have led to the experimental characterization of specific phage proteins [91]. The  
324 identification of hypothetical ORFs unique to FO-36b and SAFR-032 phage insertion elements  
325 mark them out as potential biomarker candidates for the identification/detection of such strains.

326 The distribution of the phage elements is not consistently associated with resistance  
327 properties. The Jimmer1 phage includes many genes found in all the strains whether resistant or  
328 not. The previously highlighted ICEBs1 like element found in the resistant SAFR-032 is not  
329 found in the resistant FO-36b strain. The SPP1 element found in the resistant ATCC7061 strain  
330 is missing in SAFR-032. One might speculate that individual phage elements might have been  
331 transferred to the main genome in the last two cases thereby maintaining consistency with  
332 resistance properties. However, no examples of this were found.

333

### 334 **Non-phage associated genes**

335 Genes shared by the three resistant spore producing strains but not the non-resistant ATCC7061  
336 strain are candidates for association with these resistance properties. Of the 65 ORFs we had  
337 reported earlier to be uniquely shared by SAFR-032 and FO-36b [38], 59 are shared by the  
338 MERTA strain (Additional file 4: Table S4). When the analysis is extended to all 61 genomes it  
339 was found that in each case at least one additional organism had a homolog to the candidate  
340 gene. For example, one of these ORFs (FO-36b locus tag RS87\_09285), is found to be shared by  
341 *B. safensis* MROC1 (isolated from the feces of *Gallus gallus*) and *B. safensis* RP10 (isolated

342 from soils contaminated with heavy metals in Chile). Most of the strains containing these genes  
343 are isolates from environments that have some extreme stress component. However, it is not  
344 known if the stress component would include resistance to radiation or peroxide. Based on their  
345 names alone, some of these strains, such as *B. altitudinis*, and *B. stratosphericus* may be of  
346 special interest for further comparison and investigation of their spore resistance properties.

347

### 348 **Highly unique open reading frames**

349 The nine FO-36b ORFs (hypothetical proteins) that were found to be absent from all the *B.*  
350 *safensis*/*B. pumilus* (and the *Bacillus sp.* WP8) genomes available in the NCBI database (Table  
351 2A) may be envisioned as possibly contributing to the FO-36b spore resistance. Four of these  
352 highly unique ORFs are found on phage elements (one ORF, RS87\_03140 on the *Bacillus*  
353 bacteriophage SPP1 insertion and three ORFs, viz., RS87\_14155, RS87\_14285, and  
354 RS87\_14310 on the *Brevibacillus* phage Jimmer 1 insertion). This is similar to the situation with  
355 the ICEBs-1 like element in SAFR-032 that harbors unique SAFR-032 ORFs [39]. Four other  
356 ORFs had fewer than 5 homologs found in other *B. pumilus*/*B. safensis* genomes. Two of these  
357 four ORFs, are also found on the phage elements and hence could be random remnants of lateral  
358 transfer.

359

### 360 **Genes involved in peroxide resistance and DNA repair**

361 We had previously reported 15 peroxide resistance genes in SAFR-032, of which 2 were not  
362 shared by either the earlier draft version of FO-36b, or the type strain ATCC7061 [38]. Five of  
363 these peroxide genes were uniquely shared by SAFR-032 and the earlier draft version of the FO-  
364 36b genome. Of the 8 SAFR-032 DNA repair genes reported then, 5 were not shared by FO-36b



365 or ATCC7061. We verified those results against the now complete FO-36b genome, and the  
366 status of the genes remains the same as before.

367 We also looked at the gene coding for ‘Dps’, which is a DNA-binding protein. Dps is  
368 very well-characterized for providing protection to cells during exposure to severe environmental  
369 conditions such as oxidative stress and nutritional deprivation in gram negative bacteria such as  
370 *E. coli* [92] as well as gram positive *Firmicutes* species such as *Staphylococcus aureus* [93], *B.*  
371 *subtilis* [94], *B. anthracis* [95, 96] and *B. cereus* [97, 98]. With its tripartite involvement in DNA  
372 binding, iron sequestration, and ferroxidase activity, Dps plays important roles in iron and  
373 hydrogen peroxide detoxification and acid resistance [99, 100]. The homolog for the *dps* gene in  
374 *Bacillus* strains is ‘*mrgA*’ [101], which is highly conserved amongst the resistant spore-  
375 producing FO-36b and SAFR-032, as well as the non-resistant spore-producing ATCC7061  
376 strain. Likewise, other peroxide resistance genes were checked for their presence/absence and  
377 were all found conserved in the four genomes. Thus it is unlikely that any of these genes play  
378 any role in the resistances seen in *B. safensis* FO-36b and *B. pumilus* SAFR-032.

379

### 380 **Antibiotic resistance**

381 There is increasing concern about bacterial pathogenicity under microgravity and/or in human  
382 spaceflight [102]. This is validated by reports that several microbial strains isolated from, or  
383 exposed to space environments, show resistance to desiccation, heat-shock, and/or applied  
384 antibiotics [103, 104]. A global analysis of the four genomes was undertaken to identify the  
385 presence of known antibiotic resistance related mutations. It was found that the FO-36b and  
386 SAFR genomes had significantly larger numbers (approximately 100-200 more) of the mutations  
387 as compared with the MERTA and ATCC7061 genomes. On a comparative scale, the genome of

388 BSU had almost 200 more AMR related mutations. The mere presence or the number of these  
389 mutations as such cannot be linked with the respective antibiotic resistance properties of these  
390 strains. However, further analysis of antibiotic susceptibility of these strains is warranted to  
391 establish how they differ from other strains.

## 392 **Phylogenetic analysis**

393 The current study used Whole Genome Phylogenetic Analysis methodology to delineate  
394 phylogenetic distances based on whole genomes of organisms. This and the separate genome-  
395 genome distance analysis are consistent with, but more detailed than the earlier study [38].  
396 Additionally, the “*gyrA*” tree analysis was found to support the WGPA and GGDC results. In  
397 agreement with the earlier studies, the *B. safensis*/ *B. pumilus* strains form a coherent cluster with  
398 three large sub clusters (Figure 8, 9). One of the large sub clusters includes the FO-36b, and  
399 MERTA strains as well as all other *B. safensis* strains. *B. pumilus* strains in this grouping may be  
400 usefully renamed as *B. safensis*. SAFR-032 and ATCC7061 are in a second sub cluster that is  
401 exclusively populated with *B. pumilus* strains. The third sub cluster includes all members of the  
402 *B. altitudinis* group and many *B. pumilus* strains.

## 403 **Conclusions**

404 A recent report [105] has implicated that the opposing effects of environmental DNA damage  
405 and DNA repair result in elevated rates of genome rearrangements in radiation-resistant bacteria  
406 that belong to multiple, phylogenetically independent groups including *Deinococcus*. This view  
407 is not consistent with the four genomes examined in detail here as few arrangements are  
408 observed. Comparison with earlier results [38, 39] did not yield anything new and thus although  
409 candidates continue to exist, no specific gene has been identified as likely being responsible for

410 the resistances exhibited by these organisms. The differences in resistance properties can easily  
411 be attributed to changes in expression level but of what gene or genes? With a larger  
412 phylogenetic tree now available, it should be possible to select a representative subset of strains  
413 for further resistance studies as well as sequencing.

414

## 415 **List of abbreviations used**

416 FO-36b - *B. safensis* FO-36b<sup>T</sup> (Genbank Accession no: - CP010405).

417 SAFR-032 – *B. pumilus* SAFR-032.

418 ATCC7061 – *B. pumilus* ATCC7061<sup>T</sup>.

419 MERTA - *B. safensis* JPL-MERTA-8-2.

420 BSU - *B. subtilis subsp. subtilis str.* 168.

421

## 422 **Declarations**

### 423 **1. Ethics approval and consent to participate**

424 Not Applicable

### 425 **2. Consent for publication**

426 Not applicable

### 427 **3. Availability of data and material**

428 The datasets used and analyzed within the current study are available from the NCBI  
429 Website as referenced in the paper. The sequence of the *B. safensis* FO-36b strain is being  
430 deposited with the NCBI/Genbank with the accession number CP010405. Until the deposit is  
431 complete, the data will be available from the corresponding author.

#### 432 **4. Competing Interests**

433 All authors declare they have no competing interests.

#### 434 **5. Funding**

435 This work was funded in part by NASA Grant NNX14AK36G to GEF. Discussions  
436 relating to the NASA project led to this work and provided resources for the design of the study,  
437 and writing of the manuscript.

#### 438 **6. Author's contributions**

439 KJV, VGS, and GEF conceived and designed the study. MRT annotated and curated the  
440 annotated genome, analyzed the data, performed the comparative genome analysis. SM and  
441 MRT prepared the tables and the figures. VGS prepared the library for NextGen sequencing and  
442 processed the resulting data. AW performed the sequencing. VGS and ROG conducted local  
443 sequencing studies to order contigs and close the genome. KRG provided genomic DNA. MRT,  
444 VGS and GEF prepared a draft paper which was finalized with help from all the authors. All  
445 authors read and approved the final manuscript.

446

#### 447 **7. Acknowledgements**

448 The authors acknowledge the use of the Maxwell/Opuntia Cluster and the advanced  
449 support from the Center of Advanced Computing and Data Systems at the University of Houston  
450 to carry out the research presented here. The authors would also like to thank Dr. Jan Meier-  
451 Kolthoff, Department of Bioinformatics, Leibniz Institute DSMZ (German Collection of  
452 Microorganisms and Cell Cultures), Inhoffenstraße 7 B, 38124 Braunschweig, Germany, for help  
453 with the Whole Genome Phylogenetic Analysis. This work was supported in part by NASA  
454 Grant NNX14AK36G to GEF.

455 **8. Authors' information**

456 **Madhan R Tirumalai<sup>1</sup>, Victor G. Stepanov<sup>1</sup>, Saied Montazari<sup>1</sup>, Racquel O. Gonzalez<sup>1</sup>,**  
457 **Andrea Wünsche<sup>1</sup>, Kasturi Venkateswaran<sup>2</sup>, George. E. Fox<sup>1§</sup>**

458 <sup>1</sup>Department of Biology and Biochemistry, University of Houston, Houston, TX, 77204-5001.

459 <sup>2</sup>Biotechnology & Planetary Protection Group, NASA Jet Propulsion Laboratories, California  
460 Institute of Technology, Pasadena, CA, 91109.

461

462 <sup>§</sup>Corresponding author:

463 Dr. George E. Fox

464 Dept. Biology & Biochemistry

465 University of Houston

466 Houston, TX 77204-5001

467 713-743-8363; 713-743-8351 (FAX)

468 fox@uh.edu

469

470 Email addresses:

471 MRT: mrtirum2@mail.uh.edu

472 VGS: vstepano@central.uh.edu

473 AW: andrea.wunsche@gmail.com

474 SM: SM: montazaris@gmail.com

475 ROG: raquel.gonzalez100@yahoo.com

476 KV: kasthuri.j.venkateswaran@jpl.nasa.gov

477 GEF: fox@uh.edu

478 **Endnotes**

479 None

480 **References**

- 481 1. Moissl-Eichinger C, Auerbach AK, Probst AJ, Mahnert A, Tom L, Piceno Y, Andersen  
482 GL, Venkateswaran K, Rettberg P, Barczyk S *et al*: **Quo vadis? Microbial profiling**  
483 **revealed strong effects of cleanroom maintenance and routes of contamination in**  
484 **indoor environments.** *Sci Rep* 2015, **5**:9156.
- 485 2. Venkateswaran K, La Duc MT, Horneck G: **Microbial existence in controlled habitats**  
486 **and their resistance to space conditions.** *Microbes Environ* 2014, **29**(3):243-249.
- 487 3. Venkateswaran K, Vaishampayan P, Cisneros J, Pierson DL, Rogers SO, Perry J:  
488 **International Space Station environmental microbiome - microbial inventories of**  
489 **ISS filter debris.** *Appl Microbiol Biotechnol* 2014, **98**(14):6453-6466.
- 490 4. Rummel JD, Race MS, Horneck G: **Ethical considerations for planetary protection in**  
491 **space exploration: a workshop.** *Astrobiology* 2012, **12**(11):1017-1023.
- 492 5. Debus A: **The European standard on planetary protection requirements.** *Research in*  
493 *microbiology* 2006, **157**(1):13-18.
- 494 6. Mora M, Mahnert A, Koskinen K, Pausan MR, Oberauner-Wappis L, Krause R, Perras  
495 AK, Gorkiewicz G, Berg G, Moissl-Eichinger C: **Microorganisms in Confined**  
496 **Habitats: Microbial Monitoring and Control of Intensive Care Units, Operating**  
497 **Rooms, Cleanrooms and the International Space Station.** *Front Microbiol* 2016,  
498 **7**:1573.
- 499 7. Mahnert A, Vaishampayan P, Probst AJ, Auerbach A, Moissl-Eichinger C,  
500 Venkateswaran K, Berg G: **Cleanroom Maintenance Significantly Reduces**  
501 **Abundance but Not Diversity of Indoor Microbiomes.** *PLoS One* 2015,  
502 **10**(8):e0134848.
- 503 8. Rummel JD, Meyer MA: **A consensus approach to planetary protection**  
504 **requirements: recommendations for Mars lander missions.** *Adv Space Res* 1996,  
505 **18**(1-2):317-321.
- 506 9. Venkateswaran K, Chung S, Allton J, Kern R: **Evaluation of various cleaning methods**  
507 **to remove bacillus spores from spacecraft hardware materials.** *Astrobiology* 2004,  
508 **4**(3):377-390.
- 509 10. DeVincenzi DL, Stabekis PD: **Revised planetary protection policy for solar system**  
510 **exploration.** *Adv Space Res* 1984, **4**(12):291-295.
- 511 11. Pillinger JM, Pillinger CT, Sancisi-Frey S, Spry JA: **The microbiology of spacecraft**  
512 **hardware: lessons learned from the planetary protection activities on the Beagle 2**  
513 **spacecraft.** *Res Microbiol* 2006, **157**(1):19-24.
- 514 12. Race MS: **Anticipating the reaction: public concern about sample return missions.**  
515 *Planet Rep* 1994, **14**(4):20-22.
- 516 13. Kempf MJ, Chen F, Kern R, Venkateswaran K: **Recurrent isolation of hydrogen**  
517 **peroxide-resistant spores of Bacillus pumilus from a spacecraft assembly facility.**  
518 *Astrobiology* 2005, **5**(3):391-405.

- 519 14. La Duc MT, Satomi M, Venkateswaran K: **Bacillus odysseyi sp. nov., a round-spore-**  
520 **forming bacillus isolated from the Mars Odyssey spacecraft.** *Int J Syst Evol Microbiol*  
521 2004, **54**(Pt 1):195-201.
- 522 15. Schuerger AC, Mancinelli RL, Kern RG, Rothschild LJ, McKay CP: **Survival of**  
523 **endospores of Bacillus subtilis on spacecraft surfaces under simulated martian**  
524 **environments: implications for the forward contamination of Mars.** *Icarus* 2003,  
525 **165**(2):253-276.
- 526 16. Link L, Sawyer J, Venkateswaran K, Nicholson W: **Extreme spore UV resistance of**  
527 **Bacillus pumilus isolates obtained from an ultraclean Spacecraft Assembly Facility.**  
528 *Microb Ecol* 2004, **47**(2):159-163.
- 529 17. Vaishampayan P, Miyashita M, Ohnishi A, Satomi M, Rooney A, La Duc MT,  
530 Venkateswaran K: **Description of Rummeliibacillus stabekisii gen. nov., sp. nov. and**  
531 **reclassification of Bacillus pycnus Nakamura et al. 2002 as Rummeliibacillus pycnus**  
532 **comb. nov.** *Int J Syst Evol Microbiol* 2009, **59**(Pt 5):1094-1099.
- 533 18. Vaishampayan P, Probst A, Krishnamurthi S, Ghosh S, Osman S, McDowall A,  
534 Ruckmani A, Mayilraj S, Venkateswaran K: **Bacillus horneckiae sp. nov., isolated from**  
535 **a spacecraft-assembly clean room.** *Int J Syst Evol Microbiol* 2010, **60**(Pt 5):1031-1037.
- 536 19. Vaishampayan P, Roberts AH, Augustus A, Pukall R, Schumann P, Schwendner P,  
537 Mayilraj S, Salmassi T, Venkateswaran K: **Deinococcus phoenicis sp. nov., an extreme**  
538 **ionizing-radiation-resistant bacterium isolated from the Phoenix Lander assembly**  
539 **facility.** *Int J Syst Evol Micr* 2014, **64**(Pt 10):3441-3446.
- 540 20. Msadek T, Dartois V, Kunst F, Herbaud ML, Denizot F, Rapoport G: **ClpP of Bacillus**  
541 **subtilis is required for competence development, motility, degradative enzyme**  
542 **synthesis, growth at high temperature and sporulation.** *Mol Microbiol* 1998,  
543 **27**(5):899-914.
- 544 21. Barbe V, Cruveiller S, Kunst F, Lenoble P, Meurice G, Sekowska A, Vallenet D, Wang  
545 T, Moszer I, Medigue C *et al*: **From a consortium sequence to a unified sequence: the**  
546 **Bacillus subtilis 168 reference genome a decade later.** *Microbiology* 2009, **155**(Pt  
547 6):1758-1775.
- 548 22. Benardini JN, Sawyer J, Venkateswaran K, Nicholson WL: **Spore UV and acceleration**  
549 **resistance of endolithic Bacillus pumilus and Bacillus subtilis isolates obtained from**  
550 **Sonoran desert basalt: implications for lithopanspermia.** *Astrobiology* 2003,  
551 **3**(4):709-717.
- 552 23. Horneck G, Moeller R, Cadet J, Douki T, Mancinelli RL, Nicholson WL, Panitz C,  
553 Rabbow E, Rettberg P, Spry A *et al*: **Resistance of Bacterial Endospores to Outer**  
554 **Space for Planetary Protection Purposes-Experiment PROTECT of the EXPOSE-E**  
555 **Mission.** *Astrobiology* 2012, **12**(5):445-456.
- 556 24. Vaishampayan PA, Rabbow E, Horneck G, Venkateswaran KJ: **Survival of Bacillus**  
557 **pumilus spores for a prolonged period of time in real space conditions.** *Astrobiology*  
558 2012, **12**(5):487-497.
- 559 25. Checinska A, Probst AJ, Vaishampayan P, White JR, Kumar D, Stepanov VG, Fox GE,  
560 Nilsson HR, Pierson DL, Perry J *et al*: **Microbiomes of the dust particles collected**  
561 **from the International Space Station and Spacecraft Assembly Facilities.**  
562 *Microbiome* 2015, **3**:50.

- 563 26. Mora M, Perras A, Alekhova TA, Wink L, Krause R, Aleksandrova A, Novozhilova T,  
564 Moissl-Eichinger C: **Resilient microorganisms in dust samples of the International**  
565 **Space Station-survival of the adaptation specialists.** *Microbiome* 2016, **4**(1):65.
- 566 27. Moissl-Eichinger C, Cockell C, Rettberg P: **Venturing into new realms?**  
567 **Microorganisms in space.** *FEMS microbiology reviews* 2016, **40**(5):722-737.
- 568 28. Satomi M, La Duc MT, Venkateswaran K: **Bacillus safensis sp. nov., isolated from**  
569 **spacecraft and assembly-facility surfaces.** *Int J Syst Evol Microbiol* 2006, **56**(Pt  
570 8):1735-1740.
- 571 29. Ghosh S, Osman S, Vaishampayan P, Venkateswaran K: **Recurrent isolation of**  
572 **extremotolerant bacteria from the clean room where Phoenix spacecraft**  
573 **components were assembled.** *Astrobiology* 2010, **10**(3):325-335.
- 574 30. La Duc MT, Dekas A, Osman S, Moissl C, Newcombe D, Venkateswaran K: **Isolation**  
575 **and characterization of bacteria capable of tolerating the extreme conditions of**  
576 **clean room environments.** *Appl Environ Microbiol* 2007, **73**(8):2600-2611.
- 577 31. La Duc MT, Kern R, Venkateswaran K: **Microbial monitoring of spacecraft and**  
578 **associated environments.** *Microb Ecol* 2004, **47**(2):150-158.
- 579 32. Opfell JB, Bandaruk W: **Microbial contaminants in the interiors of spacecraft**  
580 **components.** *Life Sci Space Res* 1966, **4**:133-165.
- 581 33. Puleo JR, Fields ND, Bergstrom SL, Oxborrow GS, Stabekis PD, Koukol R:  
582 **Microbiological profiles of the Viking spacecraft.** *Appl Environ Microbiol* 1977,  
583 **33**(2):379-384.
- 584 34. Newcombe DA, Schuerger AC, Benardini JN, Dickinson D, Tanner R, Venkateswaran K:  
585 **Survival of spacecraft-associated microorganisms under simulated martian UV**  
586 **irradiation.** *Appl Environ Microbiol* 2005, **71**(12):8147-8156.
- 587 35. Nicholson WL, Setlow B, Setlow P: **UV photochemistry of DNA in vitro and in**  
588 **Bacillus subtilis spores at earth-ambient and low atmospheric pressure: implications**  
589 **for spore survival on other planets or moons in the solar system.** *Astrobiology* 2002,  
590 **2**(4):417-425.
- 591 36. Coil DA, Neches RY, Lang JM, Brown WE, Severance M, Cavalier D, Eisen JA:  
592 **Growth of 48 built environment bacterial isolates on board the International Space**  
593 **Station (ISS).** *PeerJ* 2016, **4**:e1842.
- 594 37. Espariz M, Zuljan FA, Esteban L, Magni C: **Taxonomic Identity Resolution of Highly**  
595 **Phylogenetically Related Strains and Selection of Phylogenetic Markers by Using**  
596 **Genome-Scale Methods: The Bacillus pumilus Group Case.** *PLoS One* 2016,  
597 **11**(9):e0163098.
- 598 38. Tirumalai MR, Rastogi R, Zamani N, O'Bryant Williams E, Allen S, Diouf F, Kwende S,  
599 Weinstock GM, Venkateswaran KJ, Fox GE: **Candidate genes that may be responsible**  
600 **for the unusual resistances exhibited by Bacillus pumilus SAFR-032 spores.** *PLoS*  
601 *One* 2013, **8**(6):e66012.
- 602 39. Tirumalai MR, Fox GE: **An ICEBs1-like element may be associated with the extreme**  
603 **radiation and desiccation resistance of Bacillus pumilus SAFR-032 spores.**  
604 *Extremophiles* 2013, **17**(5):767-774.
- 605 40. Stepanov VG, Tirumalai MR, Montazari S, Checinska A, Venkateswaran K, Fox GE:  
606 **Bacillus pumilus SAFR-032 Genome Revisited: Sequence Update and Re-**  
607 **Annotation.** *PLoS One* 2016, **11**(6):e0157331.



- 608 41. Coil DA, Benardini JN, Eisen JA: **Draft Genome Sequence of *Bacillus safensis* JPL-**  
609 **MERTA-8-2, Isolated from a Mars-Bound Spacecraft.** *Genome Announc* 2015, **3**(6).
- 610 42. Borodina TA, Lehrach H, Soldatov AV: **DNA purification on homemade silica spin-**  
611 **columns.** *Anal Biochem* 2003, **321**(1):135-137.
- 612 43. **Sickle: A sliding-window, adaptive, quality-based trimming tool for FastQ files**  
613 **(Version 1.33) [Software].** [Available at <https://github.com/najoshi/sickle>.]
- 614 44. Bolger AM, Lohse M, Usadel B: **Trimmomatic: a flexible trimmer for Illumina**  
615 **sequence data.** *Bioinformatics* 2014, **30**(15):2114-2120.
- 616 45. Simpson JT, Wong K, Jackman SD, Schein JE, Jones SJ, Birol I: **ABYSS: a parallel**  
617 **assembler for short read sequence data.** *Genome Res* 2009, **19**(6):1117-1123.
- 618 46. Angiuoli SV, Gussman A, Klimke W, Cochrane G, Field D, Garrity G, Kodira CD,  
619 Kyrpides N, Madupu R, Markowitz V *et al*: **Toward an online repository of Standard**  
620 **Operating Procedures (SOPs) for (meta)genomic annotation.** *Omic* 2008, **12**(2):137-  
621 141.
- 622 47. Johnson M, Zaretskaya I, Raytselis Y, Merezhuk Y, McGinnis S, Madden TL: **NCBI**  
623 **BLAST: a better web interface.** *Nucleic Acids Res* 2008, **36**(Web Server issue):W5-9.
- 624 48. Zhou Y, Liang Y, Lynch KH, Dennis JJ, Wishart DS: **PHAST: a fast phage search tool.**  
625 *Nucleic acids research* 2011, **39**(Web Server issue):W347-352.
- 626 49. Arndt D, Grant JR, Marcu A, Sajed T, Pon A, Liang Y, Wishart DS: **PHASTER: a**  
627 **better, faster version of the PHAST phage search tool.** *Nucleic acids research* 2016,  
628 **44**(W1):W16-21.
- 629 50. Meier-Kolthoff JP, Auch AF, Klenk HP, Goker M: **Genome sequence-based species**  
630 **delimitation with confidence intervals and improved distance functions.** *BMC*  
631 *Bioinformatics* 2013, **14**:60.
- 632 51. Meier-Kolthoff JP AA, Klenk H-P, Göker M: **Highly parallelized inference of large**  
633 **genome-based phylogenies.** *Concurrency and Computation: Practice and Experience*  
634 2014, **26**(10):1715–1729
- 635 52. Camacho C, Coulouris G, Avagyan V, Ma N, Papadopoulos J, Bealer K, Madden TL:  
636 **BLAST+: architecture and applications.** *BMC Bioinformatics* 2009, **10**:421.
- 637 53. Lefort V, Desper R, Gascuel O: **FastME 2.0: A Comprehensive, Accurate, and Fast**  
638 **Distance-Based Phylogeny Inference Program.** *Molecular Biology and Evolution*  
639 2015, **32**(10):2798-2800.
- 640 54. Farris JS: **Estimating Phylogenetic Trees from Distance Matrices.** *American*  
641 *Naturalist* 1972, **106**(951):645-&.
- 642 55. Meier-Kolthoff JP, Klenk HP, Goker M: **Taxonomic use of DNA G plus C content and**  
643 **DNA-DNA hybridization in the genomic age.** *Int J Syst Evol Micr* 2014, **64**:352-356.
- 644 56. Levican A, Collado L, Figueras MJ: ***Arcobacter cloacae* sp nov and *Arcobacter suis* sp**  
645 **nov., two new species isolated from food and sewage.** *Systematic and Applied*  
646 *Microbiology* 2013, **36**(1):22-27.
- 647 57. Shamsi H, Mardani K, Ownagh A: **Phylogenetic analysis of *Escherichia coli* isolated**  
648 **from broilers with colibacillosis based on *gyrA* gene sequences.** *Can J Vet Res* 2017,  
649 **81**(1):28-32.
- 650 58. Abdelbaqi K, Menard A, Prouzet-Mauleon V, Bringaud F, Lehours P, Megraud F:  
651 **Nucleotide sequence of the *gyrA* gene of *Arcobacter* species and characterization of**  
652 **human ciprofloxacin-resistant clinical isolates.** *Fems Immunol Med Mic* 2007,  
653 **49**(3):337-345.

- 654 59. La Duc MT, Satomi M, Agata N, Venkateswaran K: **gyrB as a phylogenetic**  
655 **discriminator for members of the Bacillus anthracis-cereus-thuringiensis group.** *J*  
656 *Microbiol Meth* 2004, **56**(3):383-394.
- 657 60. Dickinson DN, La Duc MT, Satomi M, Winefordner JD, Powell DH, Venkateswaran K:  
658 **MALDI-TOFMS compared with other polyphasic taxonomy approaches for the**  
659 **identification and classification of Bacillus pumilus spores.** *J Microbiol Methods*  
660 2004, **58**(1):1-12.
- 661 61. Fox GE, Wisotzkey JD, Jurtshuk P, Jr.: **How close is close: 16S rRNA sequence**  
662 **identity may not be sufficient to guarantee species identity.** *Int J Syst Bacteriol* 1992,  
663 **42**(1):166-170.
- 664 62. Kumar S, Stecher G, Tamura K: **MEGA7: Molecular Evolutionary Genetics Analysis**  
665 **Version 7.0 for Bigger Datasets.** *Molecular Biology and Evolution* 2016, **33**(7):1870-  
666 1874.
- 667 63. Kumar S, Stecher G, Peterson D, Tamura K: **MEGA-CC: computing core of molecular**  
668 **evolutionary genetics analysis program for automated and iterative data analysis.**  
669 *Bioinformatics* 2012, **28**(20):2685-2686.
- 670 64. Tamura K, Nei M: **Estimation of the Number of Nucleotide Substitutions in the**  
671 **Control Region of Mitochondrial-DNA in Humans and Chimpanzees.** *Molecular*  
672 *Biology and Evolution* 1993, **10**(3):512-526.
- 673 65. Rzhetsky A, Nei M: **A Simple Method for Estimating and Testing Minimum-**  
674 **Evolution Trees.** *Molecular Biology and Evolution* 1992, **9**(5):945-967.
- 675 66. Kumar MNaS: **Molecular Evolution and Phylogenetics:** Oxford University Press, New  
676 York.; 2000.
- 677 67. Saitou N, Nei M: **The neighbor-joining method: a new method for reconstructing**  
678 **phylogenetic trees.** *Molecular Biology and Evolution* 1987, **4**(4):406-425.
- 679 68. Tamura K, Nei M, Kumar S: **Prospects for inferring very large phylogenies by using**  
680 **the neighbor-joining method.** *P Natl Acad Sci USA* 2004, **101**(30):11030-11035.
- 681 69. Tamura K, Stecher G, Peterson D, Filipinski A, Kumar S: **MEGA6: Molecular**  
682 **Evolutionary Genetics Analysis Version 6.0.** *Molecular Biology and Evolution* 2013,  
683 **30**(12):2725-2729.
- 684 70. Darling AC, Mau B, Blattner FR, Perna NT: **Mauve: multiple alignment of conserved**  
685 **genomic sequence with rearrangements.** *Genome Res* 2004, **14**(7):1394-1403.
- 686 71. Jia B, Raphenya AR, Alcock B, Waglechner N, Guo P, Tsang KK, Lago BA, Dave BM,  
687 Pereira S, Sharma AN *et al*: **CARD 2017: expansion and model-centric curation of the**  
688 **comprehensive antibiotic resistance database.** *Nucleic Acids Research* 2017,  
689 **45**(D1):D566-D573.
- 690 72. Harwood CR, Williams DM, Lovett PS: **Nucleotide sequence of a Bacillus pumilus**  
691 **gene specifying chloramphenicol acetyltransferase.** *Gene* 1983, **24**(2-3):163-169.
- 692 73. Vertessy BG, Toth J: **Keeping uracil out of DNA: physiological role, structure and**  
693 **catalytic mechanism of dUTPases.** *Acc Chem Res* 2009, **42**(1):97-106.
- 694 74. Nagy GN, Leveles I, Vertessy BG: **Preventive DNA repair by sanitizing the cellular**  
695 **(deoxy)nucleoside triphosphate pool.** *Febs J* 2014, **281**(18):4207-4223.
- 696 75. Szabo JE, Nemeth V, Papp-Kadar V, Nyiri K, Leveles I, Bendes AA, Zagyva I, Rona G,  
697 Palinkas HL, Besztercei B *et al*: **Highly potent dUTPase inhibition by a bacterial**  
698 **repressor protein reveals a novel mechanism for gene expression control.** *Nucleic*  
699 *acids research* 2014, **42**(19):11912-11920.

- 700 76. Salmond GP, Fineran PC: **A century of the phage: past, present and future.** *Nature*  
701 *reviews Microbiology* 2015, **13**(12):777-786.
- 702 77. Brussow H, Canchaya C, Hardt WD: **Phages and the evolution of bacterial pathogens:**  
703 **from genomic rearrangements to lysogenic conversion.** *Microbiology and molecular*  
704 *biology reviews : MMBR* 2004, **68**(3):560-602, table of contents.
- 705 78. Neely MN, Friedman DI: **Functional and genetic analysis of regulatory regions of**  
706 **coliphage H-19B: location of shiga-like toxin and lysis genes suggest a role for phage**  
707 **functions in toxin release.** *Molecular microbiology* 1998, **28**(6):1255-1267.
- 708 79. Canchaya C, Fournous G, Chibani-Chennoufi S, Dillmann ML, Brussow H: **Phage as**  
709 **agents of lateral gene transfer.** *Current Opinion in Microbiology* 2003, **6**(4):417-424.
- 710 80. Touchon M, de Sousa JAM, Rocha EPC: **Embracing the enemy: the diversification of**  
711 **microbial gene repertoires by phage-mediated horizontal gene transfer.** *Current*  
712 *Opinion in Microbiology* 2017, **38**:66-73.
- 713 81. Brown-Jaque M, Calero-Caceres W, Muniesa M: **Transfer of antibiotic-resistance**  
714 **genes via phage-related mobile elements.** *Plasmid* 2015, **79**:1-7.
- 715 82. Zinder ND, Lederberg J: **Genetic exchange in Salmonella.** *Journal of bacteriology*  
716 1952, **64**(5):679-699.
- 717 83. Yasbin RE, Young FE: **Transduction in Bacillus-Subtilis by Bacteriophage Spp1.** *J*  
718 *Virol* 1974, **14**(6):1343-1348.
- 719 84. Merrill BD, Grose JH, Breakwell DP, Burnett SH: **Characterization of Paenibacillus**  
720 **larvae bacteriophages and their genomic relationships to firmicute bacteriophages.**  
721 *BMC Genomics* 2014, **15**.
- 722 85. Miller ES, Kutter E, Mosig G, Arisaka F, Kunisawa T, Ruger W: **Bacteriophage T4**  
723 **genome.** *Microbiol Mol Biol R* 2003, **67**(1):86-+.
- 724 86. Steyert SR, Sahl JW, Fraser CM, Teel LD, Scheutz F, Rasko DA: **Comparative**  
725 **genomics and stx phage characterization of LEE-negative Shiga toxin-producing**  
726 **Escherichia coli.** *Front Cell Infect Microbiol* 2012, **2**.
- 727 87. Cui XL, You JJ, Sun L, Yang XJ, Zhang T, Huang KC, Pan XW, Zhang FJ, He Y, Yang  
728 HJ: **Characterization of Pseudomonas aeruginosa Phage C11 and Identification of**  
729 **Host Genes Required for Virion Maturation.** *Sci Rep* 2016, **6**.
- 730 88. O'Flaherty S, Coffey A, Edwards R, Meaney W, Fitzgerald GF, Ross RP: **Genome of**  
731 **Staphylococcal phage K: a new lineage of Myoviridae infecting gram-positive**  
732 **bacteria with a low G+C content.** *Journal of Bacteriology* 2004, **186**(9):2862-2871.
- 733 89. Varani AD, Souza RC, Nakaya HI, de Lima WC, de Almeida LGP, Kitajima EW, Chen  
734 J, Civerolo E, Vasconcelos ATR, Van Sluys MA: **Origins of the Xylella fastidiosa**  
735 **Prophage-Like Regions and Their Impact in Genome Differentiation.** *PLoS One*  
736 2008, **3**(12).
- 737 90. Hendrix RW, Hatfull GF, Smith MCM: **Bacteriophages with tails: chasing their**  
738 **origins and evolution.** *Research in Microbiology* 2003, **154**(4):253-257.
- 739 91. Liu J, Dehbi M, Moeck G, Arhin F, Bauda P, Bergeron D, Callejo M, Ferretti V, Ha NH,  
740 Kwan T *et al*: **Antimicrobial drug discovery through bacteriophage genomics.** *Nat*  
741 *Biotechnol* 2004, **22**(2):185-191.
- 742 92. Almiron M, Link AJ, Furlong D, Kolter R: **A novel DNA-binding protein with**  
743 **regulatory and protective roles in starved Escherichia coli.** *Genes & development*  
744 1992, **6**(12B):2646-2654.

- 745 93. Ushijima Y, Yoshida O, Villanueva MJ, Ohniwa RL, Morikawa K: **Nucleoid clumping**  
746 **is dispensable for the Dps-dependent hydrogen peroxide resistance in**  
747 **Staphylococcus aureus.** *Microbiology* 2016, **162**(10):1822-1828.
- 748 94. Antelmann H, Engelmann S, Schmid R, Sorokin A, Lapidus A, Hecker M: **Expression of**  
749 **a stress- and starvation-induced dps/pexB-homologous gene is controlled by the**  
750 **alternative sigma factor sigmaB in Bacillus subtilis.** *Journal of Bacteriology* 1997,  
751 **179**(23):7251-7256.
- 752 95. Tu WY, Pohl S, Gizynski K, Harwood CR: **The iron-binding protein Dps2 confers**  
753 **peroxide stress resistance on Bacillus anthracis.** *Journal of Bacteriology* 2012,  
754 **194**(5):925-931.
- 755 96. Schwartz JK, Liu XS, Tosha T, Diebold A, Theil EC, Solomon EI: **CD and MCD**  
756 **spectroscopic studies of the two Dps miniferritin proteins from Bacillus anthracis:**  
757 **role of O<sub>2</sub> and H<sub>2</sub>O<sub>2</sub> substrates in reactivity of the diiron catalytic centers.**  
758 *Biochemistry* 2010, **49**(49):10516-10525.
- 759 97. Shu JC, Soo PC, Chen JC, Hsu SH, Chen LC, Chen CY, Liang SH, Buu LM, Chen CC:  
760 **Differential regulation and activity against oxidative stress of Dps proteins in**  
761 **Bacillus cereus.** *Int J Med Microbiol* 2013, **303**(8):662-673.
- 762 98. Wang SW, Chen CY, Tseng JT, Liang SH, Chen SC, Hsieh C, Chen YH, Chen CC: **orf4**  
763 **of the Bacillus cereus sigB gene cluster encodes a general stress-inducible Dps-like**  
764 **bacterioferritin.** *Journal of Bacteriology* 2009, **191**(14):4522-4533.
- 765 99. Zhao G, Ceci P, Ilari A, Giangiacomo L, Laue TM, Chiancone E, Chasteen ND: **Iron**  
766 **and hydrogen peroxide detoxification properties of DNA-binding protein from**  
767 **starved cells. A ferritin-like DNA-binding protein of Escherichia coli.** *The Journal of*  
768 *biological chemistry* 2002, **277**(31):27689-27696.
- 769 100. Chiancone E: **Dps proteins, an efficient detoxification and DNA protection**  
770 **machinery in the bacterial response to oxidative stress.** *RENDICONTI LINCEI* 2008,  
771 **19**(3):261.
- 772 101. Chen L, Helmann JD: **Bacillus subtilis MrgA is a Dps(PexB) homologue: evidence for**  
773 **metalloregulation of an oxidative-stress gene.** *Molecular microbiology* 1995,  
774 **18**(2):295-300.
- 775 102. Taylor PW: **Impact of space flight on bacterial virulence and antibiotic susceptibility.**  
776 *Infect Drug Resist* 2015, **8**:249-262.
- 777 103. Urbaniak C, Sielaff AC, Frey KG, Allen JE, Singh N, Jaing C, Wheeler K,  
778 Venkateswaran K: **Detection of antimicrobial resistance genes associated with the**  
779 **International Space Station environmental surfaces.** *Sci Rep* 2018, **8**(1):814.
- 780 104. Zhang D, Chang D, Zhang X, Yu Y, Guo Y, Wang J, Li T, Xu G, Dai W, Liu C:  
781 **Genome Sequence of Escherichia coli Strain LCT-EC52, Which Acquired Changes**  
782 **in Antibiotic Resistance Properties after the Shenzhou-VIII Mission.** *Genome*  
783 *Announc* 2014, **2**(2).
- 784 105. Repar J, Supek F, Klanjscek T, Warnecke T, Zahradka K, Zahradka D: **Elevated Rate of**  
785 **Genome Rearrangements in Radiation-Resistant Bacteria.** *Genetics* 2017,  
786 **205**(4):1677-1689.

789

## 790 **Figures**

791 **Figure 1.** The *Bacillus* bacteriophage SPP1 (NC\_004166) homologous region in the *B. safensis*  
792 FO-36b genome, as compared with the equivalent genomic regions of *B. pumilus* ATCC7061<sup>T</sup>,  
793 *B. pumilus* SAFR-032 and *B. subtilis subsp. subtilis str.* 168. The locus tag numbers are given  
794 inside the boxes/rectangles. Red diamonds denote absence of a single gene/homolog. Red  
795 rectangle denotes absence of a series/cluster of ORFs/genes. Green box encloses the phage  
796 insertion region. Green diamond denotes absence of a single gene/homolog within the phage.  
797 "hyd" = hydrolase, "chp" = conserved hypothetical protein, "pept" = peptidase, "hp" =  
798 hypothetical protein, "TR" = transcriptional regulator, "Ps" = pseudogene, "lp" = lipoprotein,  
799 "gsp" = group specific protein, "oxi" = oxidase.

800

801 **Figure 2.** The *Bacillus* bacteriophage SPP1 (NC\_004166) homologous region in the *B. safensis*  
802 FO-36b genome, as compared with the equivalent genomic region of *B. safensis* JPL\_MERTA8-  
803 2. Red diamonds denote absence of a single gene/homolog. Red rectangle denotes absence of a  
804 series/cluster of ORFs/genes. Green box encloses the phage insertion region.

805

806 **Figure 3.** Overall scheme of the *Brevibacillus* phage Jimmer1 (NC\_029104) phage insertion in  
807 the *B. safensis* FO-36b genome. The three blocks A, B and C and the genes they encompass are  
808 shown. The first part of Block C is a duplication of Block A.

809

810 **Figure 4.** The *Brevibacillus* phage Jimmer1 (NC\_029104) phage insertion in the *B. safensis* FO-  
811 36b genome as compared with the equivalent region in the genome of *B. pumilus* ATCC7061<sup>T</sup>.  
812 Black box encloses the phage insertion region(s). Green (dashed line) box corresponds to block

813 A. Green (dotted line) box corresponds to block B. Blue (dashed line) box corresponds to block  
814 C. Red (dashed line) box encloses 'terminase' genes. A diamond denotes absence of a single  
815 gene/homolog within the phage, while rectangle denotes absence of a cluster of genes/homologs.  
816 "hp" = hypothetical protein, "chp" = conserved hypothetical protein, "pp" = phage portal protein,  
817 "sp" = structural protein, "sgp" = spore germination protein, "int" = integrase.

818

819 **Figure 5.** The *Brevibacillus* phage Jimmer1 (NC\_029104) phage insertion in the *B. safensis* FO-  
820 36b genome as compared with the equivalent region in the genome of *B. safensis*  
821 JPL\_MERTA8-2. "hp" = hypothetical protein, "chp" = conserved hypothetical protein, "pp" =  
822 phage portal protein, "sp" = structural protein, "sgp" = spore germination protein, "int" =  
823 integrase.

824

825 **Figure 6.** The *Brevibacillus* phage Jimmer1 (NC\_029104) phage insertion in the *B. safensis* FO-  
826 36b genome as compared with the equivalent region in the genome of *B. pumilus* SAFR-032.  
827 "hp" = hypothetical protein, "chp" = conserved hypothetical protein, "pp" = phage portal protein,  
828 "sp" = structural protein, "sgp" = spore germination protein, "int" = integrase.

829

830 **Figure 7.** The *Brevibacillus* phage Jimmer1 (NC\_029104) phage insertion in the *B. safensis* FO-  
831 36b genome as compared with the equivalent region in the genome of *B. subtilis*. "hp" =  
832 hypothetical protein, "chp" = conserved hypothetical protein, "pp" = phage portal protein, "sp" =  
833 structural protein, "sgp" = spore germination protein, "int" = integrase.

834

835 **Figure 8. Whole genome Phylogenetic Analysis (WGPA) using the latest version of the**  
836 **Genome-BLAST Distance Phylogeny (GBDP).**

837 *B. safensis* FO-36b, *B. safensis* JPL\_MERTA8-2B, *B. pumilus* SAFR-032, and *B. pumilus*  
838 ATCC7061<sup>T</sup> are highlighted in red dash-lined rectangles

839

840 **Figure 9. Molecular Phylogenetic analysis by the Maximum Likelihood method**

841 *B. safensis* FO-36b, *B. safensis* JPL\_MERTA8-2B, *B. pumilus* SAFR-032, and *B. pumilus*  
842 ATCC7061<sup>T</sup> are highlighted in red dash-lined rectangles.

843

844 **Tables and captions**

845 **Table 1: List of *B. safensis* FO-36b genes not shared by *B. pumilus* SAFR-032,**

846 ***B. pumilus* ATCC7061<sup>T</sup> and *B. safensis* JPL\_MERTA8-2.**

847 ^ - Genes/ORFs not found in either *B. pumilus* SAFR-032, or, *B. pumilus* ATCC7061<sup>T</sup>, or, *B.*  
848 *safensis* JPL\_MERTA8-2 or any other *B. pumilus* and *B. safensis* genomes. HP – Hypothetical  
849 protein(s)

850

851 **Table 2: *B. safensis* F0-36b unique genes.**

852 \* Genes that are part of phage elements

853

854 **Table 3: *B. safensis* FO-36b genes (hypothetical proteins) with fewer than 5 homologs**

855 \* Genes that are part of phage elements

856

857

858 **Additional files**

859 **Additional file 1: Table S1.** In silico DNA-DNA hybridization (DDH) values showing Genome-  
860 genome distance [50] relationship values for the genomes of various *B. pumilus*, *B. safensis*, *B.*  
861 *altitudinis* strains. The genomes of *Geobacillus kaustophilus*, and *B. subtilis subsp. subtilis str.*  
862 168 serving as outliers in the *Firmicutes* group and that of gram-negative *E.coli* MG1655, as a  
863 non-*Firmicutes* outlier.

864

865 **Additional file 2: Table S2.** Presence and absence of the *B. safensis* FO-36b CRISPR module  
866 element protein(s) in the other *B. pumilus* / *B. safensis* genomes.

867

868 **Additional file 3: Table S3.** *B. safensis* FO-36b characteristic genes (ORFs/genes that are absent  
869 from *B. pumilus* SAFR-032, *B. pumilus* ATCC7061<sup>T</sup>, and, *B. safensis* JPL-MERTA-8-2) and  
870 their occurrence (presence/absence) in the *B. pumilus*/*B. safensis* genomes available in the NCBI  
871 database. P: Present, A: Absent, \*found on phage insertions.

872

873 **Additional file 4: Table S4.** *B. safensis* FO-36b genes reported earlier as shared by *B. pumilus*  
874 SAFR-032 and not found in the *B. pumilus* ATCC7061<sup>T</sup> strain [38], compared with the *B.*  
875 *safensis* JPL-MERTA-8-2 strain, and the other *B. pumilus* / *B. safensis* genomes.

876

877 **Additional file 5: Figure S1.** Whole genome alignment of the previously existing *B. safensis*  
878 FO-36b sequence (GCA\_000691165.1 / ASJD00000000) with our current updated sequence  
879 (CP010405) using Mauve [70].

880



881 **Additional file 6: Figure S2.** Molecular Phylogenetic analysis by the Neighbor-Joining method.

882 *B. safensis* FO-36b, *B. safensis* JPL\_MERTA8-2B, *B. pumilus* SAFR-032, and *B. pumilus*

883 ATCC7061<sup>T</sup> are highlighted in red dash-lined rectangles.

884

885 **Additional file 7: Figure S3.** Molecular Phylogenetic analysis using the Minimum Evolution

886 method. *B. safensis* FO-36b, *B. safensis* JPL\_MERTA8-2B, *B. pumilus* SAFR-032, and *B.*

887 *pumilus* ATCC7061<sup>T</sup> are highlighted in red dash-lined rectangles.

888

889

**Table 1: List of *B. safensis* FO-36b (characteristic) genes not shared by *B. pumilus* SAFR-032, *B. pumilus* ATCC7061<sup>T</sup> and *B. safensis* JPL\_MERTA8-2.**

| <b>Hypothetical protein coding ORFs (unknown function)</b>                                                                                                                                            |                           |
|-------------------------------------------------------------------------------------------------------------------------------------------------------------------------------------------------------|---------------------------|
| <b>Locus tag RS87_#</b>                                                                                                                                                                               |                           |
| 01590<br>02635-40<br>02695-700<br>02960<br>03370<br>03615-20<br>04125<br>04345<br>06055^<br>09165<br>09820^<br>12770^<br>14125-30<br>14140<br>14150^<br>15275^<br>17540<br>18710<br>18745<br>18755-60 | HP (25)                   |
| 02980,<br>02995,<br>03000,<br>03010,<br>03030-35,<br>03050^,<br>03065,<br>03075-095,<br>03110,<br>03125,<br>03195-200,<br>03220,<br>14285,<br>14395,<br>14400,<br>14310^,<br>14320^,<br>14410.        | HP on phages (24)         |
| 03215 (ps)                                                                                                                                                                                            | Pseudogene (on phage) (1) |

| <b>Locus tag<br/>RS87_#</b> | <b>Gene</b>                                  | <b>Function</b>                                 |
|-----------------------------|----------------------------------------------|-------------------------------------------------|
| <b>03015</b>                | <b>recombinase RecT</b>                      | <b>DNA repair/recombination (2)</b>             |
| <b>03060</b>                | <b>dUTPase</b>                               |                                                 |
| <b>03190</b>                | <b>alkaline phosphatase</b>                  | <b>Phage element components (2)</b>             |
| <b>03210</b>                | <b>phage tail protein</b>                    |                                                 |
| <b>03225</b>                | <b>protein Xh1A</b>                          |                                                 |
| <b>04350</b>                | <b>CRISPR module RAMP protein Cmr1</b>       | <b>Type III-B CRISPR element components (6)</b> |
| <b>04355</b>                | <b>CRISPR-associated protein Cas10/Cmr2</b>  |                                                 |
| <b>04360</b>                | <b>CRISPR module-associated protein Cmr3</b> |                                                 |
| <b>04365</b>                | <b>CRISPR module RAMP protein Cmr4</b>       |                                                 |
| <b>04370</b>                | <b>CRISPR module-associated protein Cmr5</b> |                                                 |
| <b>04375</b>                | <b>CRISPR module RAMP protein Cmr6</b>       |                                                 |
| <b>09105</b>                | <b>protein IolH</b>                          | <b>Metabolism (4)</b>                           |
| <b>09130</b>                | <b>5-deoxy-glucuronate isomerase</b>         |                                                 |
| <b>09150</b>                | <b>isomerase</b>                             |                                                 |
| <b>09160</b>                | <b>myo-inosose-2 dehydratase</b>             |                                                 |

<sup>^</sup> - Genes/ORFs not found in either *B. pumilus* SAFR-032, or, *B. pumilus* ATCC7061<sup>T</sup>, or, *B. safensis* JPL\_MERTA8-2 or any other *B. pumilus* and *B. safensis* genomes.

HP – Hypothetical protein(s).

**Table 2: FO-36b unique genes (hypothetical proteins)**

| <b>Locus tag RS87_#</b> |
|-------------------------|
| <b>03140*</b>           |
| <b>09820</b>            |
| <b>12770</b>            |
| <b>14110</b>            |
| <b>14145</b>            |
| <b>14150</b>            |
| <b>14155*</b>           |
| <b>14285*</b>           |
| <b>14310*</b>           |

**\* Genes that are part of phage elements**

**Table 3: FO-36b genes (hypothetical proteins) with fewer than 5 homologs**

| <b>Locus tag RS87_#</b> |                                                                                                                                                                                                                                          |
|-------------------------|------------------------------------------------------------------------------------------------------------------------------------------------------------------------------------------------------------------------------------------|
| <b>03030*</b>           | <b>only four homologs in<br/><i>B.safensis</i> U41 (GCA_001938685.1),<br/><i>B.safensis</i> U17-1 (GCA_001938705.1),<br/><i>B.pumilus</i> CCMA-560 (GCA_000444805.1), and,<br/><i>B.pumilus</i> strain 36R_ATNSAL (GCA_002744245.1).</b> |
| <b>03050*</b>           | <b>only one homolog in <i>B.pumilus</i> strain 36R_ATNSAL (GCA_002744245.1).</b>                                                                                                                                                         |
| <b>03110</b>            | <b>only two homologs in<br/><i>B.safensis</i> 7783 (GCA_002276315.1), and,<br/><i>B.safensis</i> Bcs96 (GCA_002155005.1).</b>                                                                                                            |
| <b>04125</b>            | <b>only one homolog in <i>B.pumilus</i> PE09-72 (GCA_002174275.1).</b>                                                                                                                                                                   |

**\* Genes that are part of phage elements**

Phage 1 insertion

<https://doi.org/10.1101/283937>

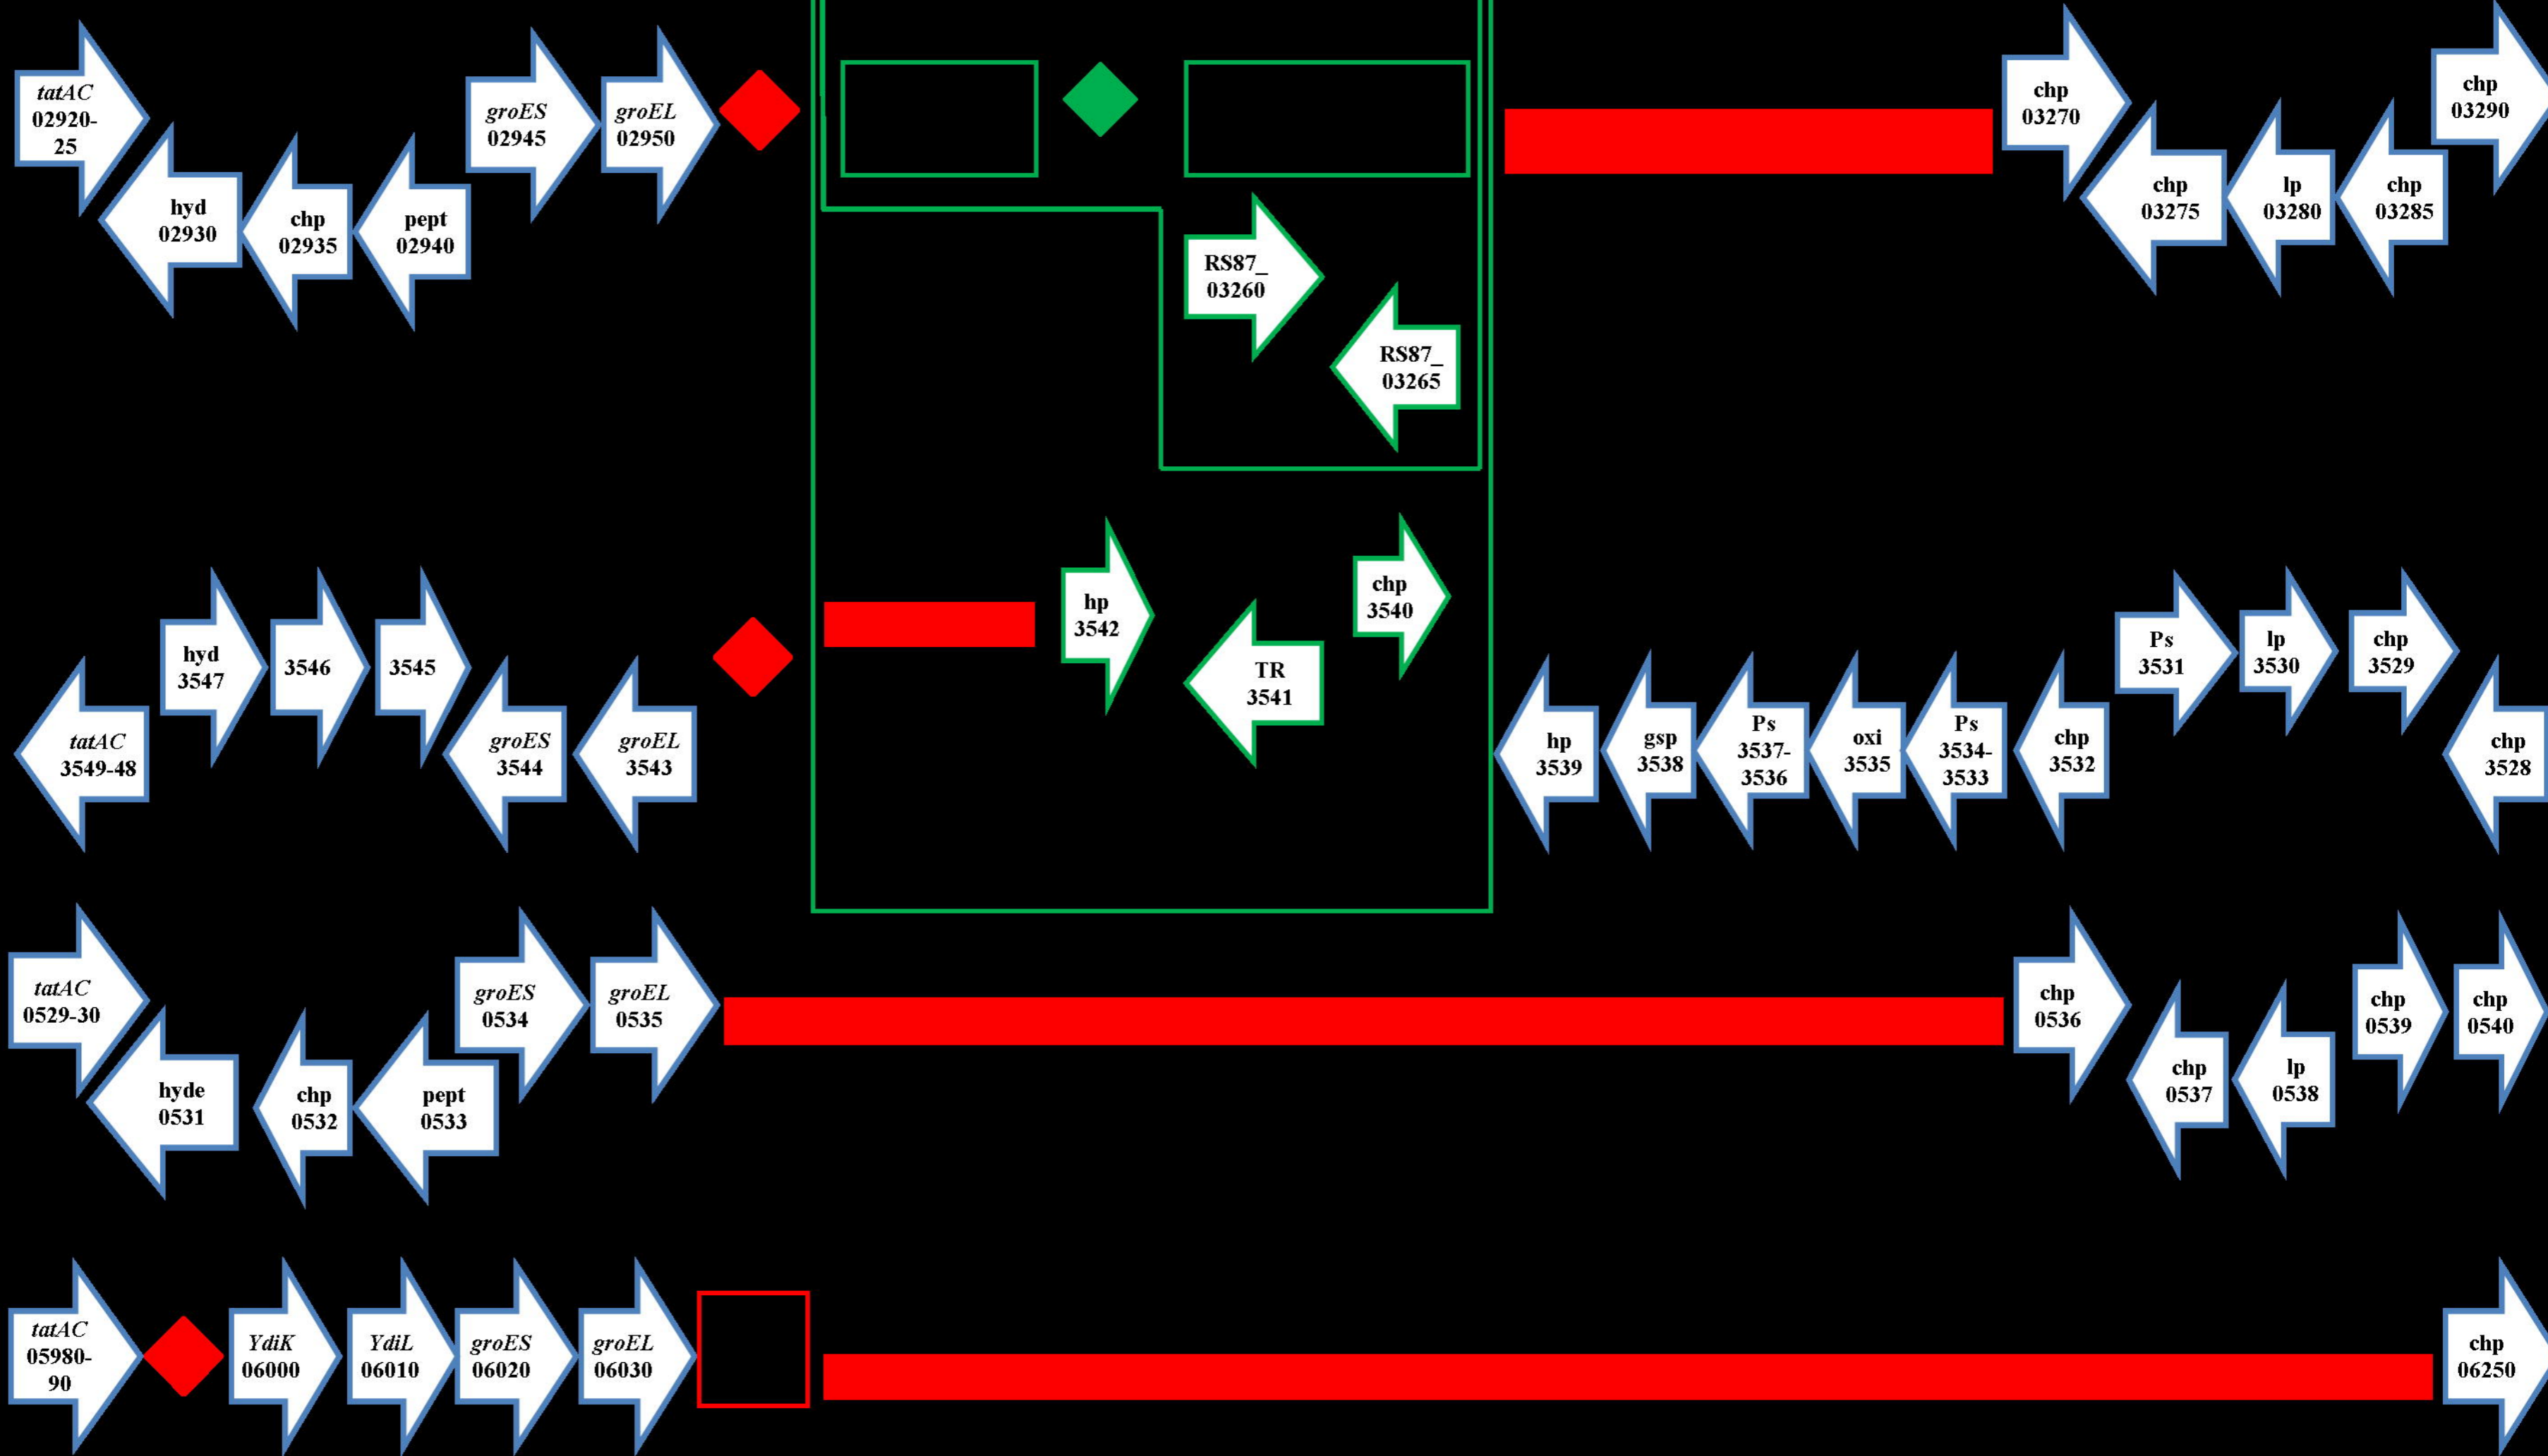

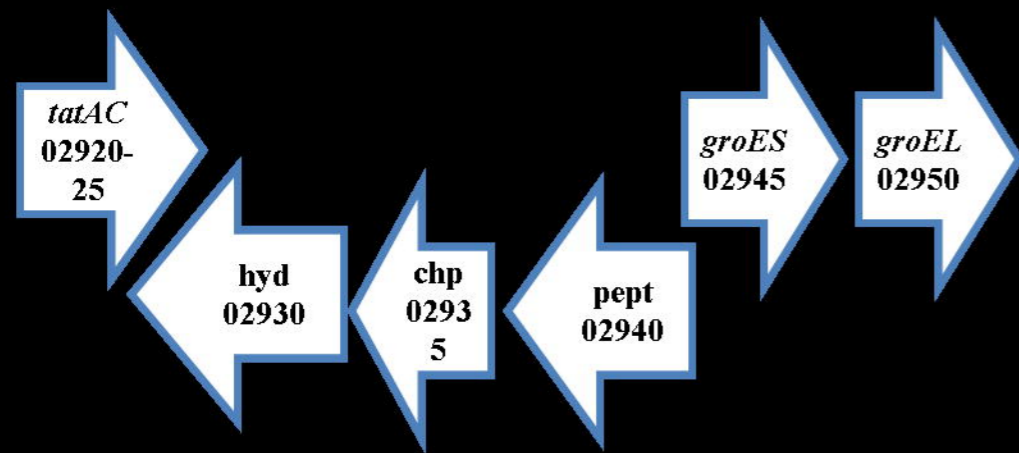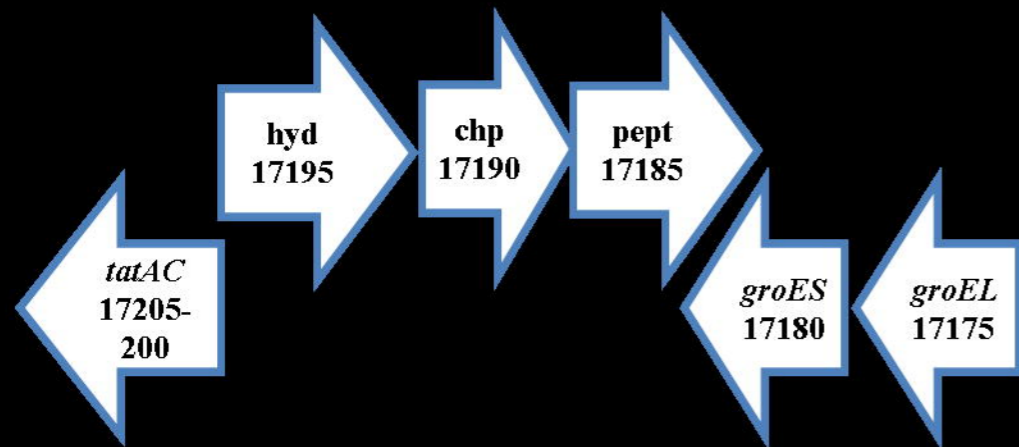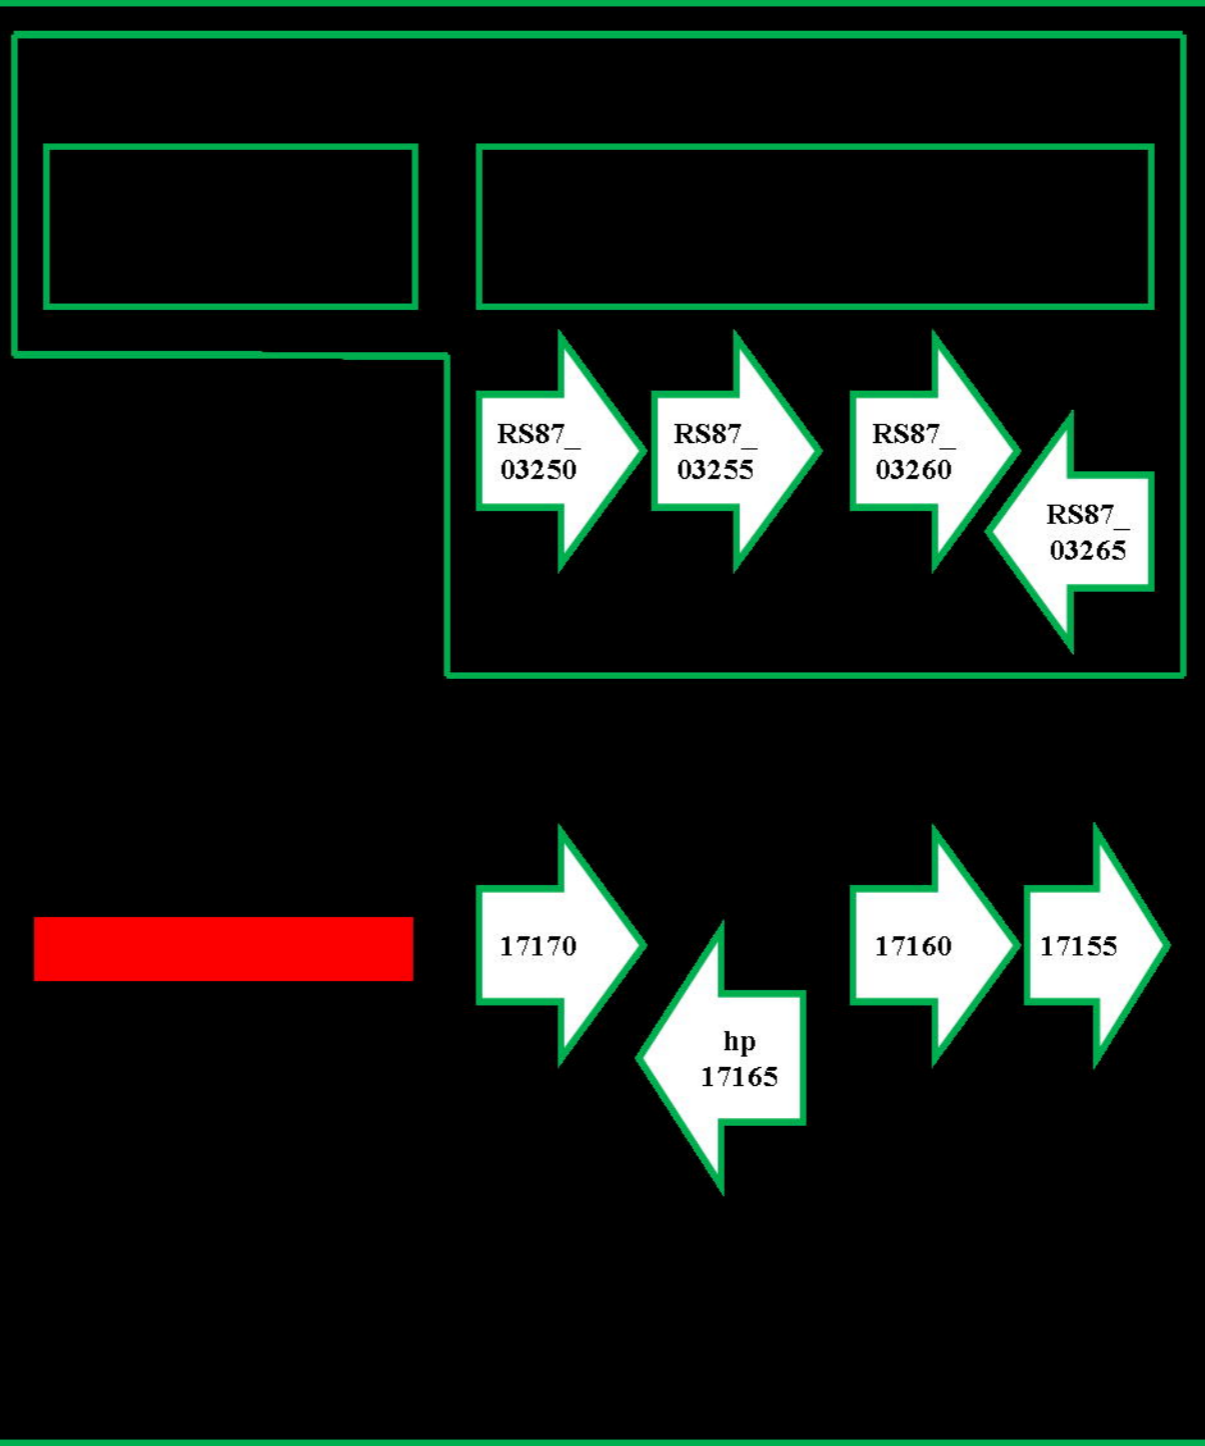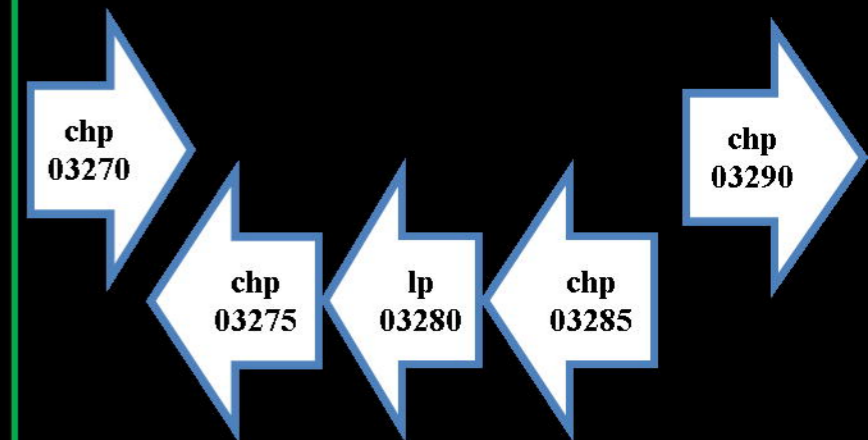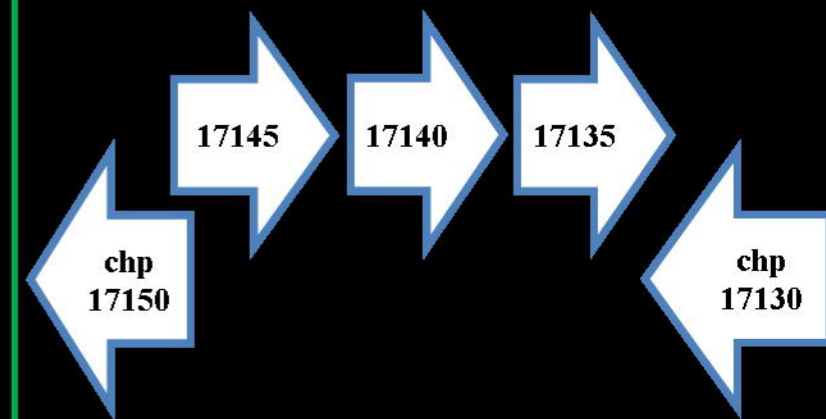

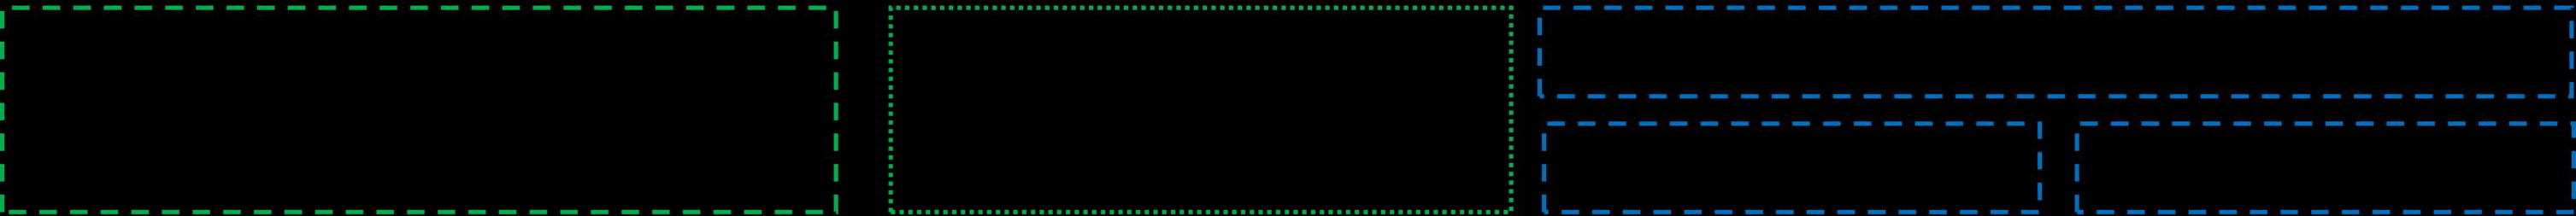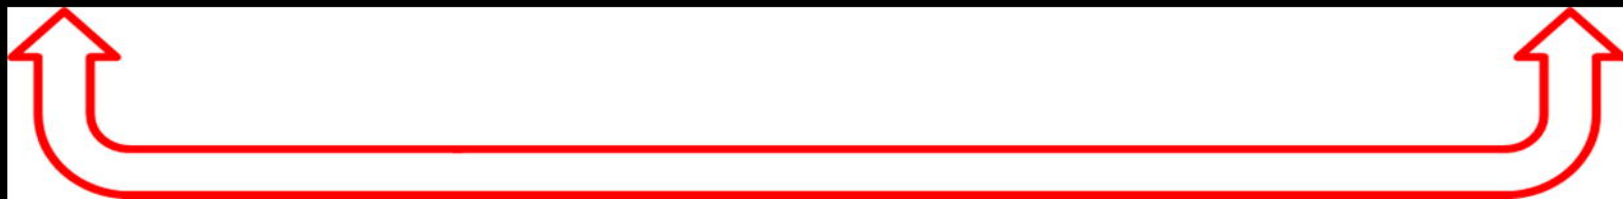



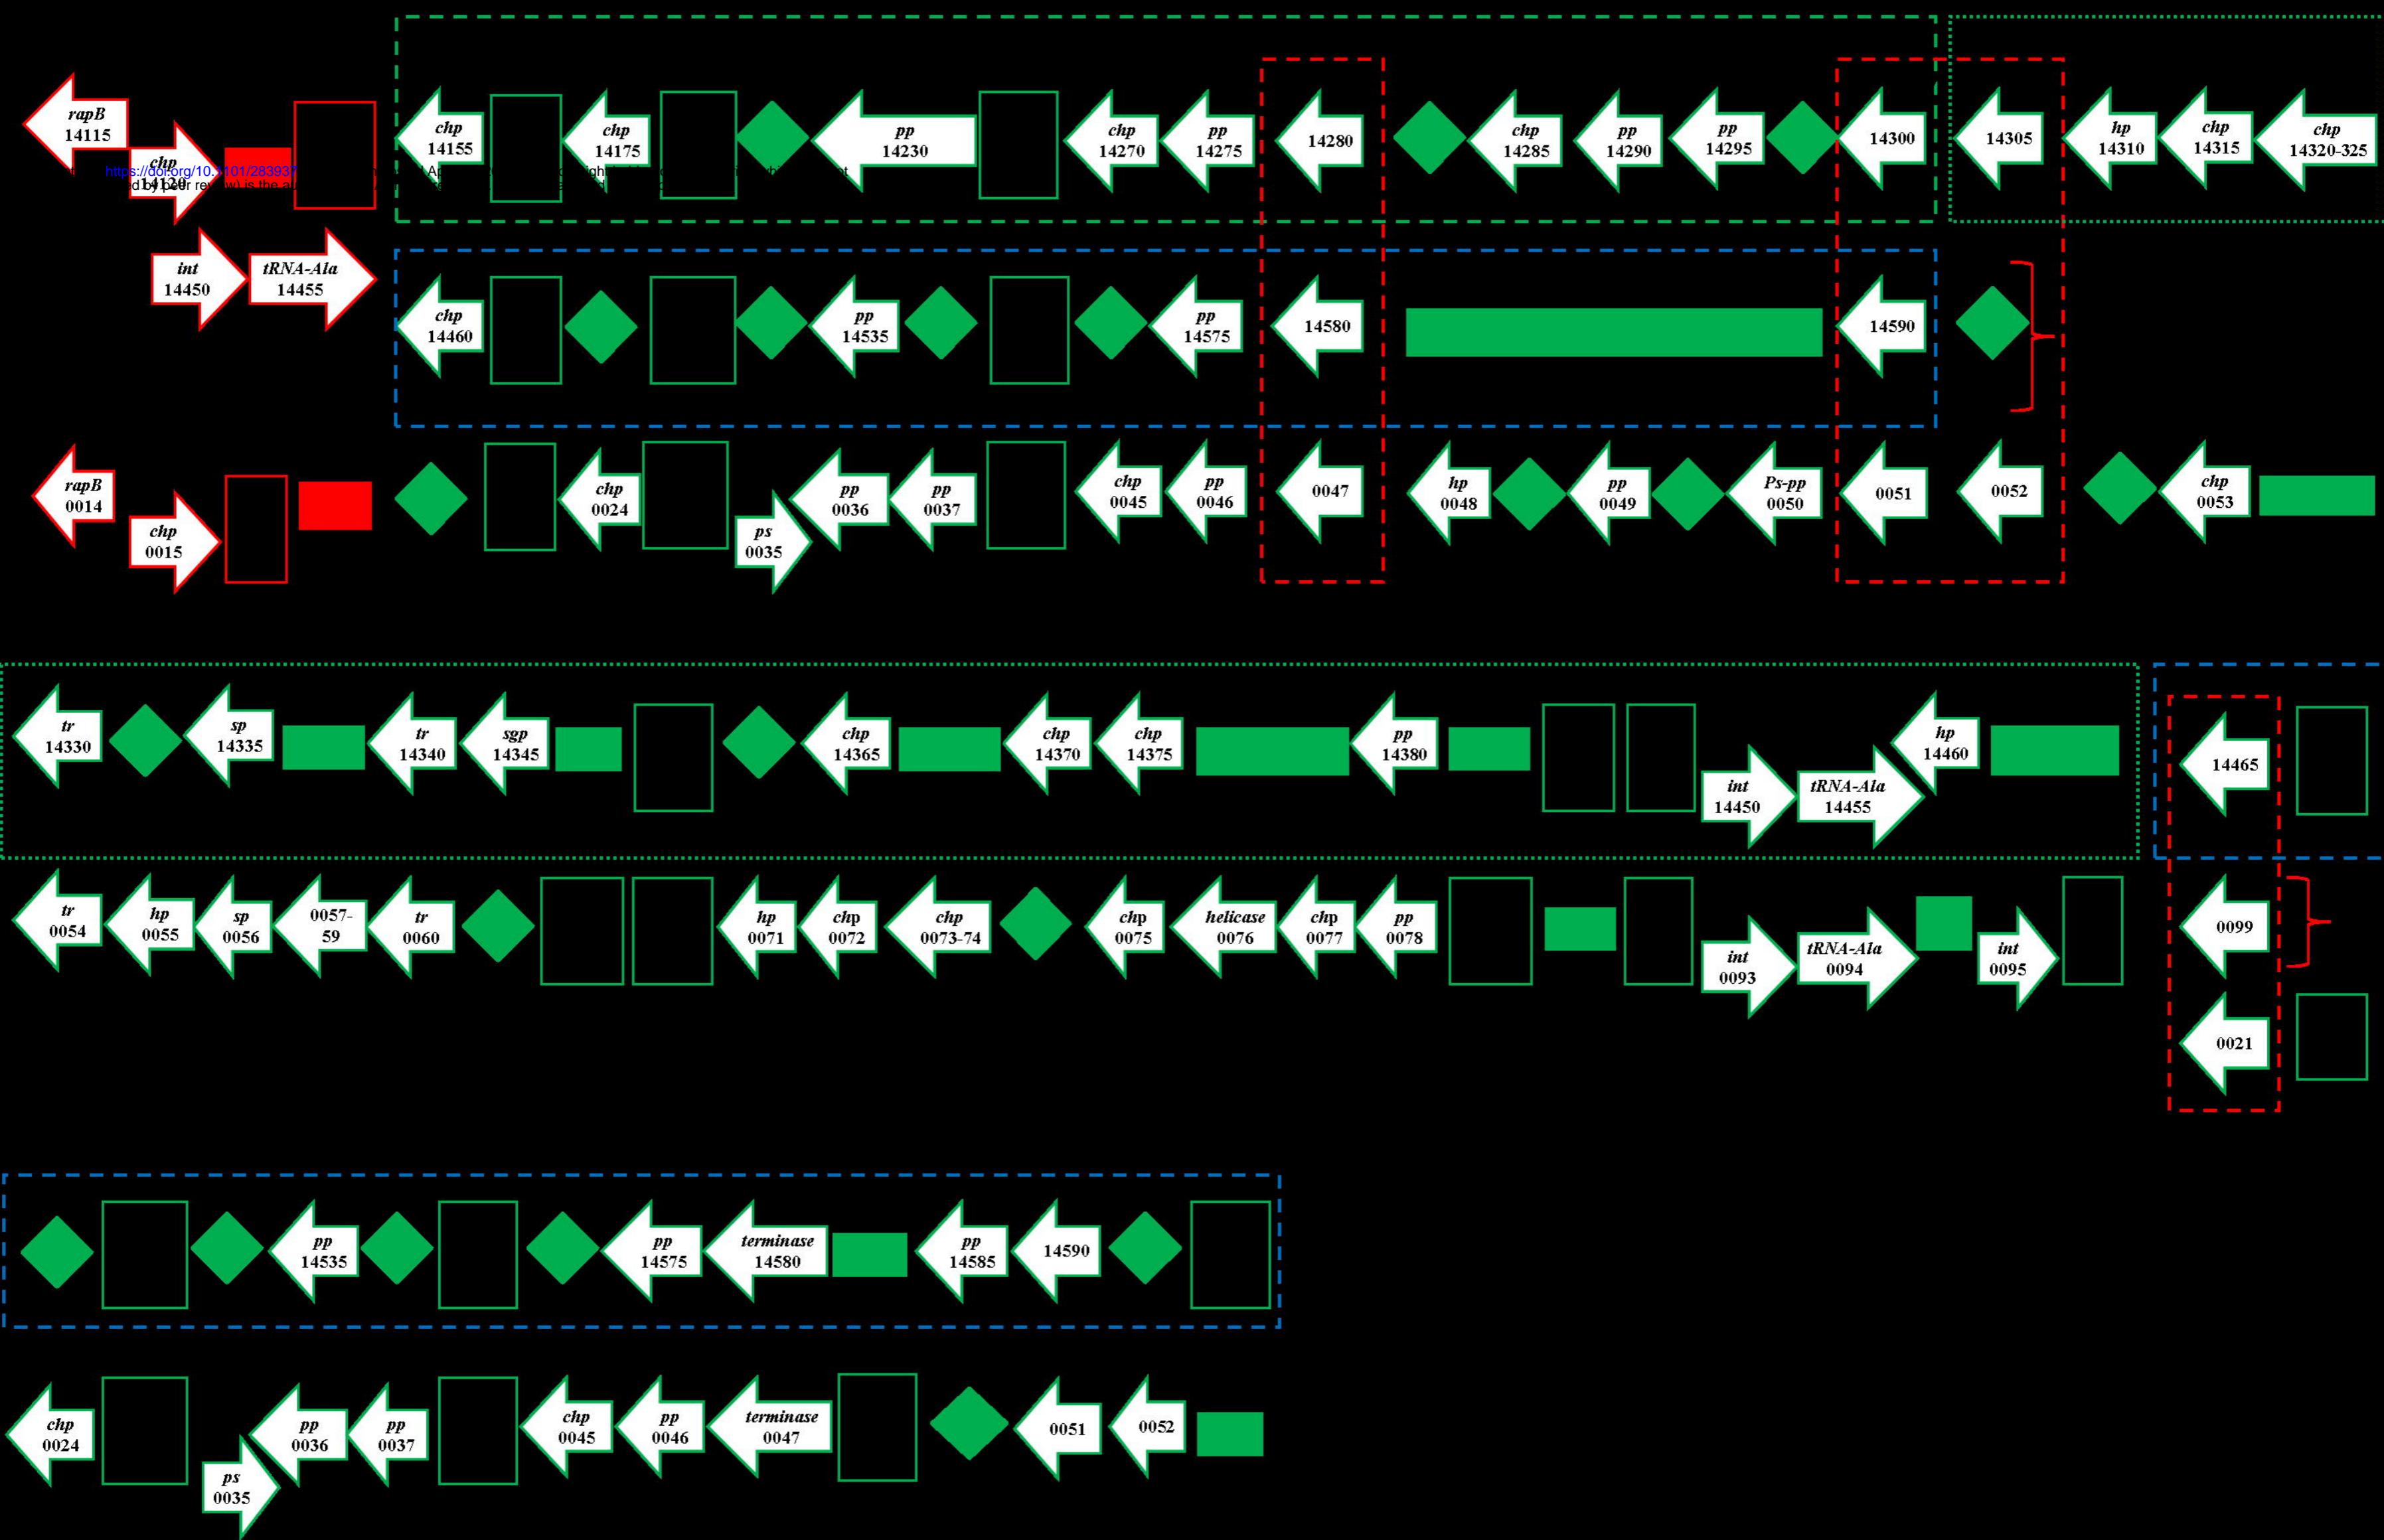

Phage 2 insertion

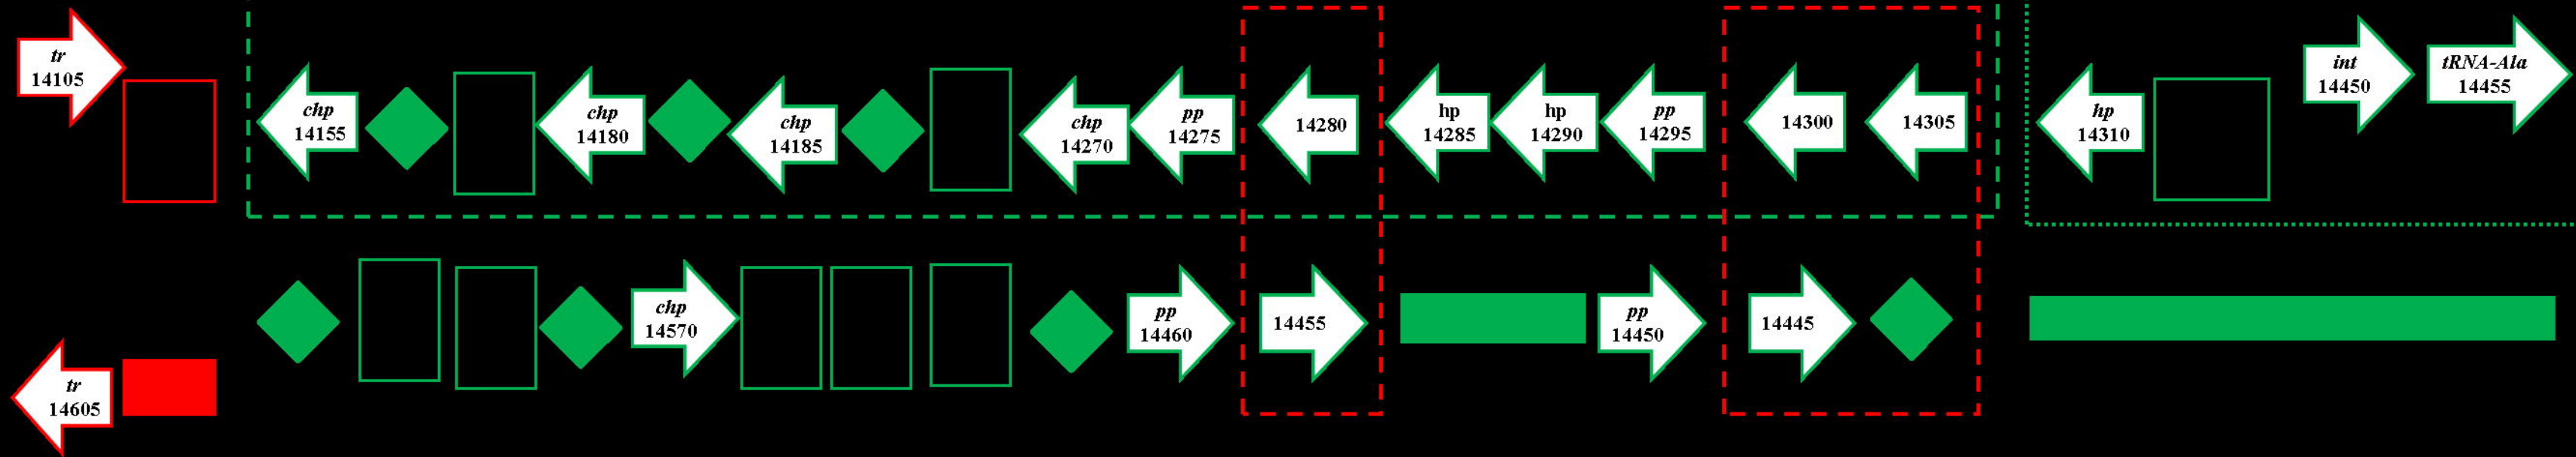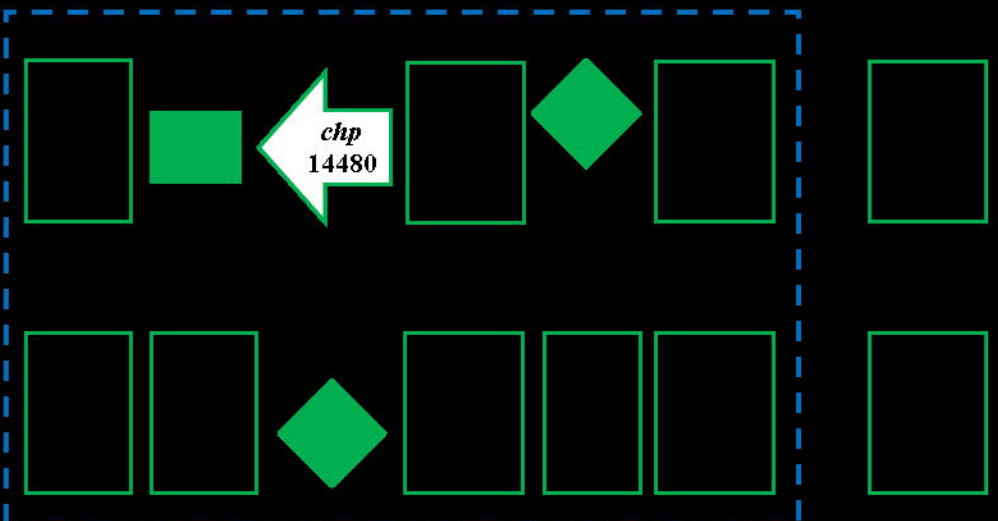

Phage 2 insertion

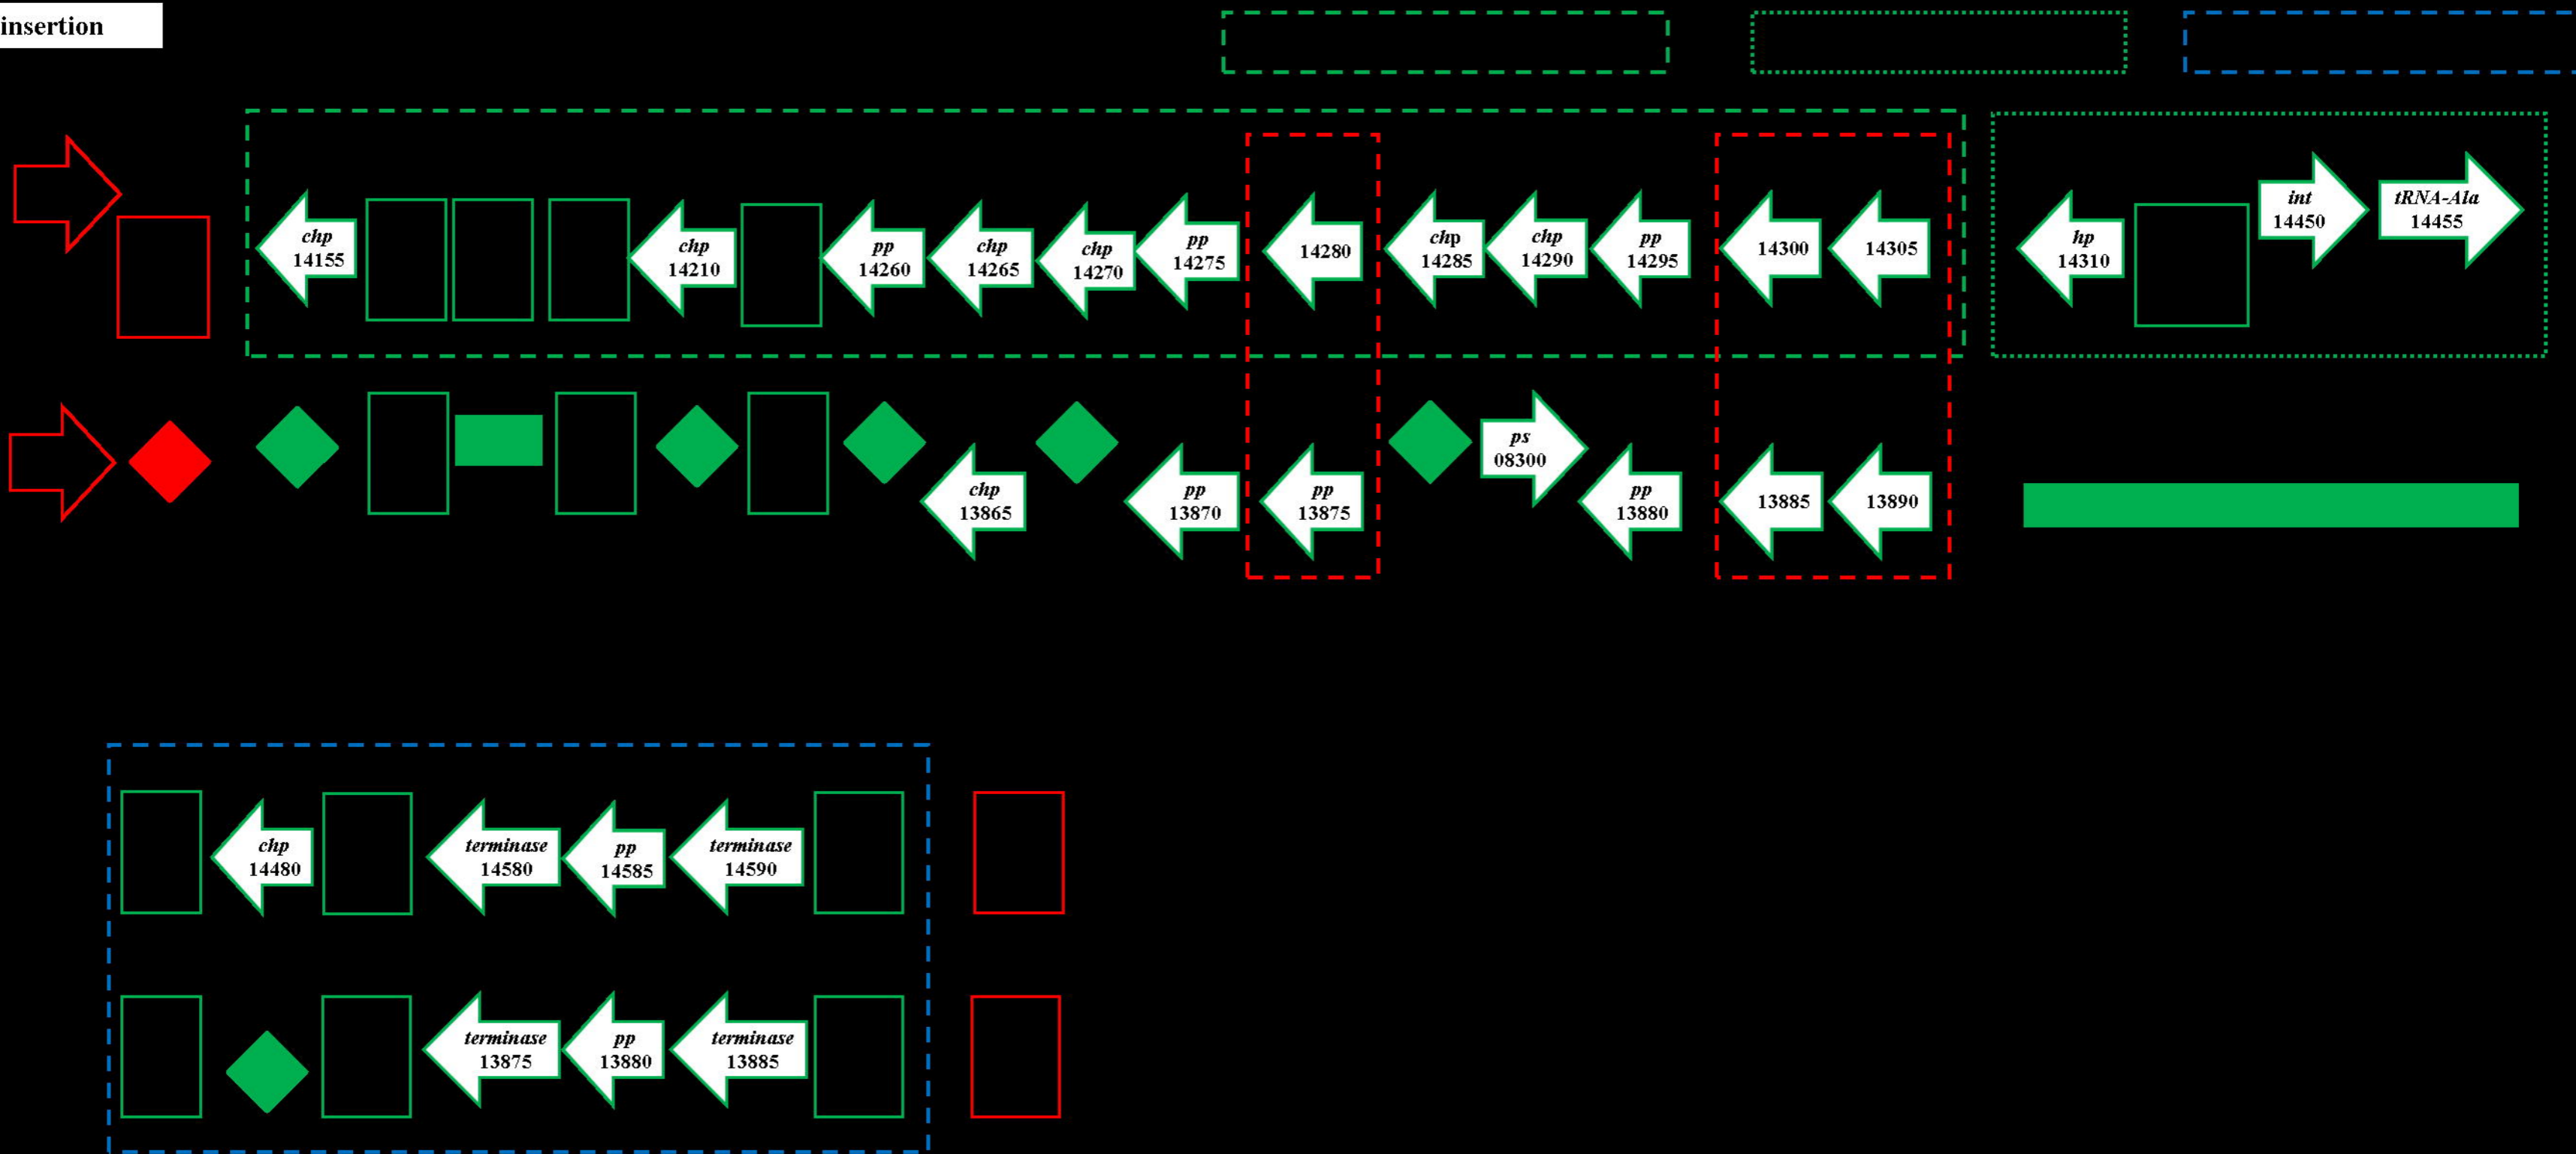

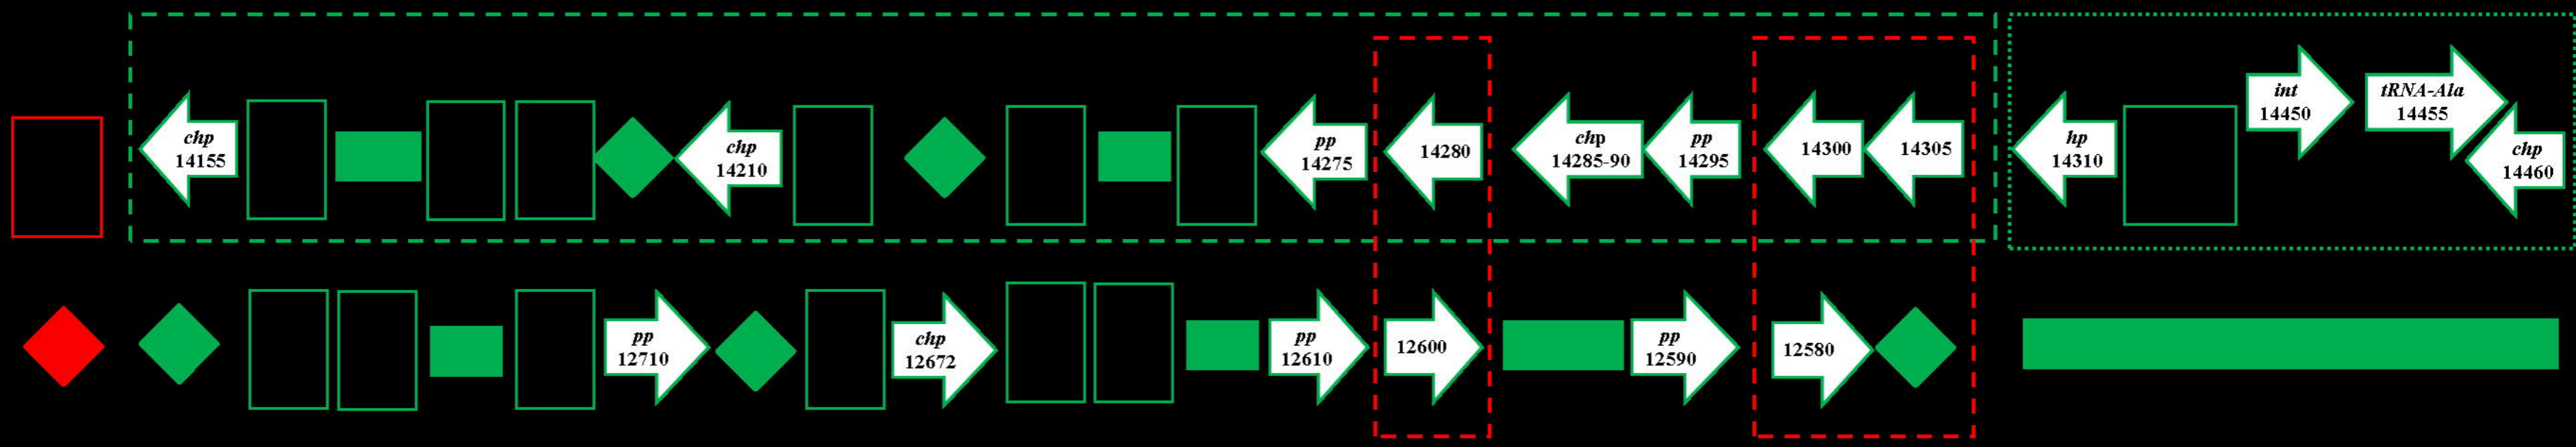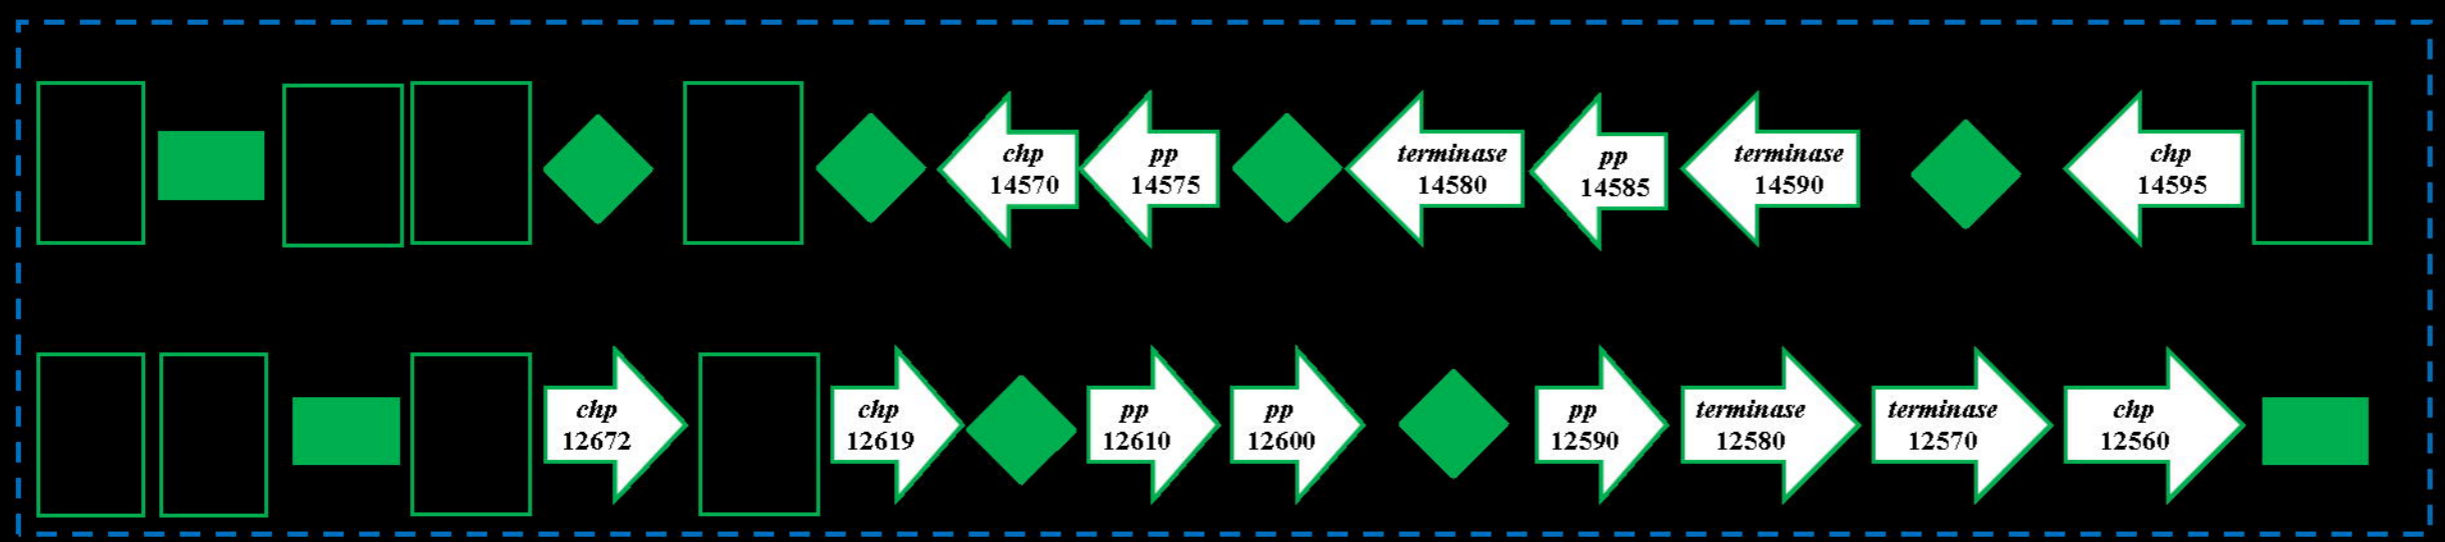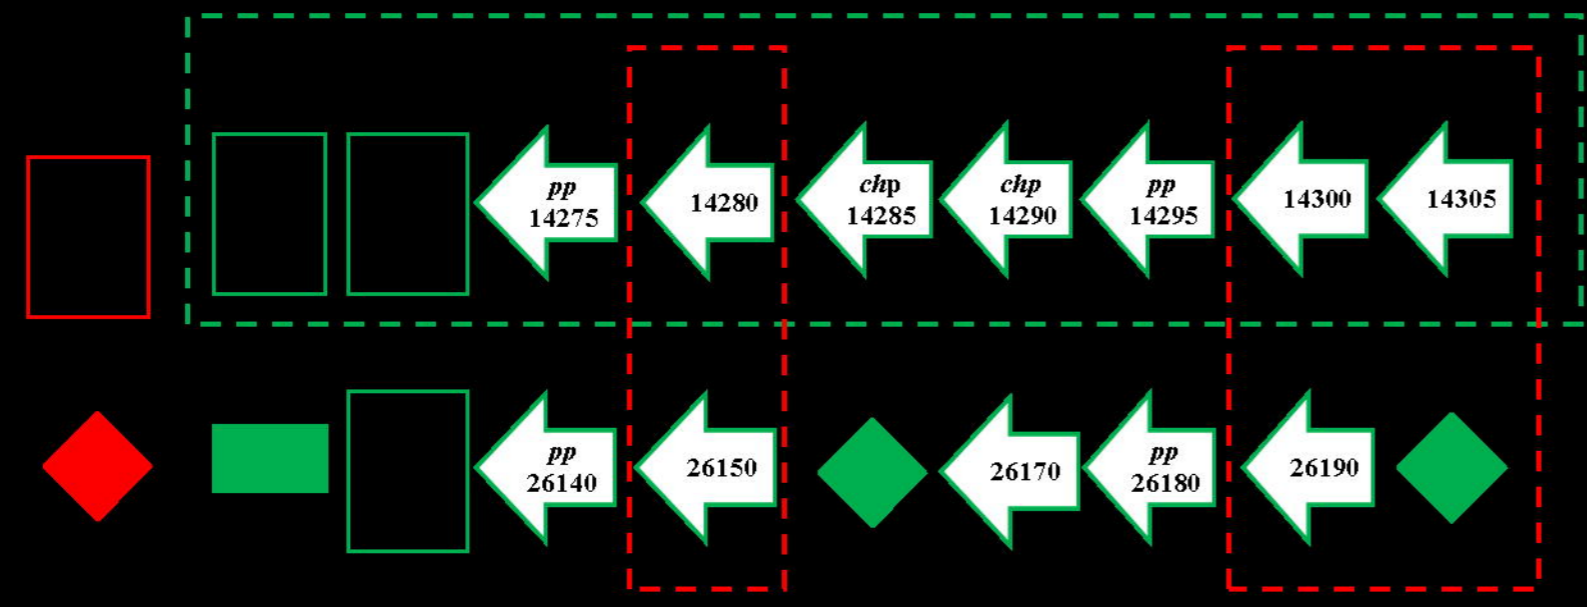

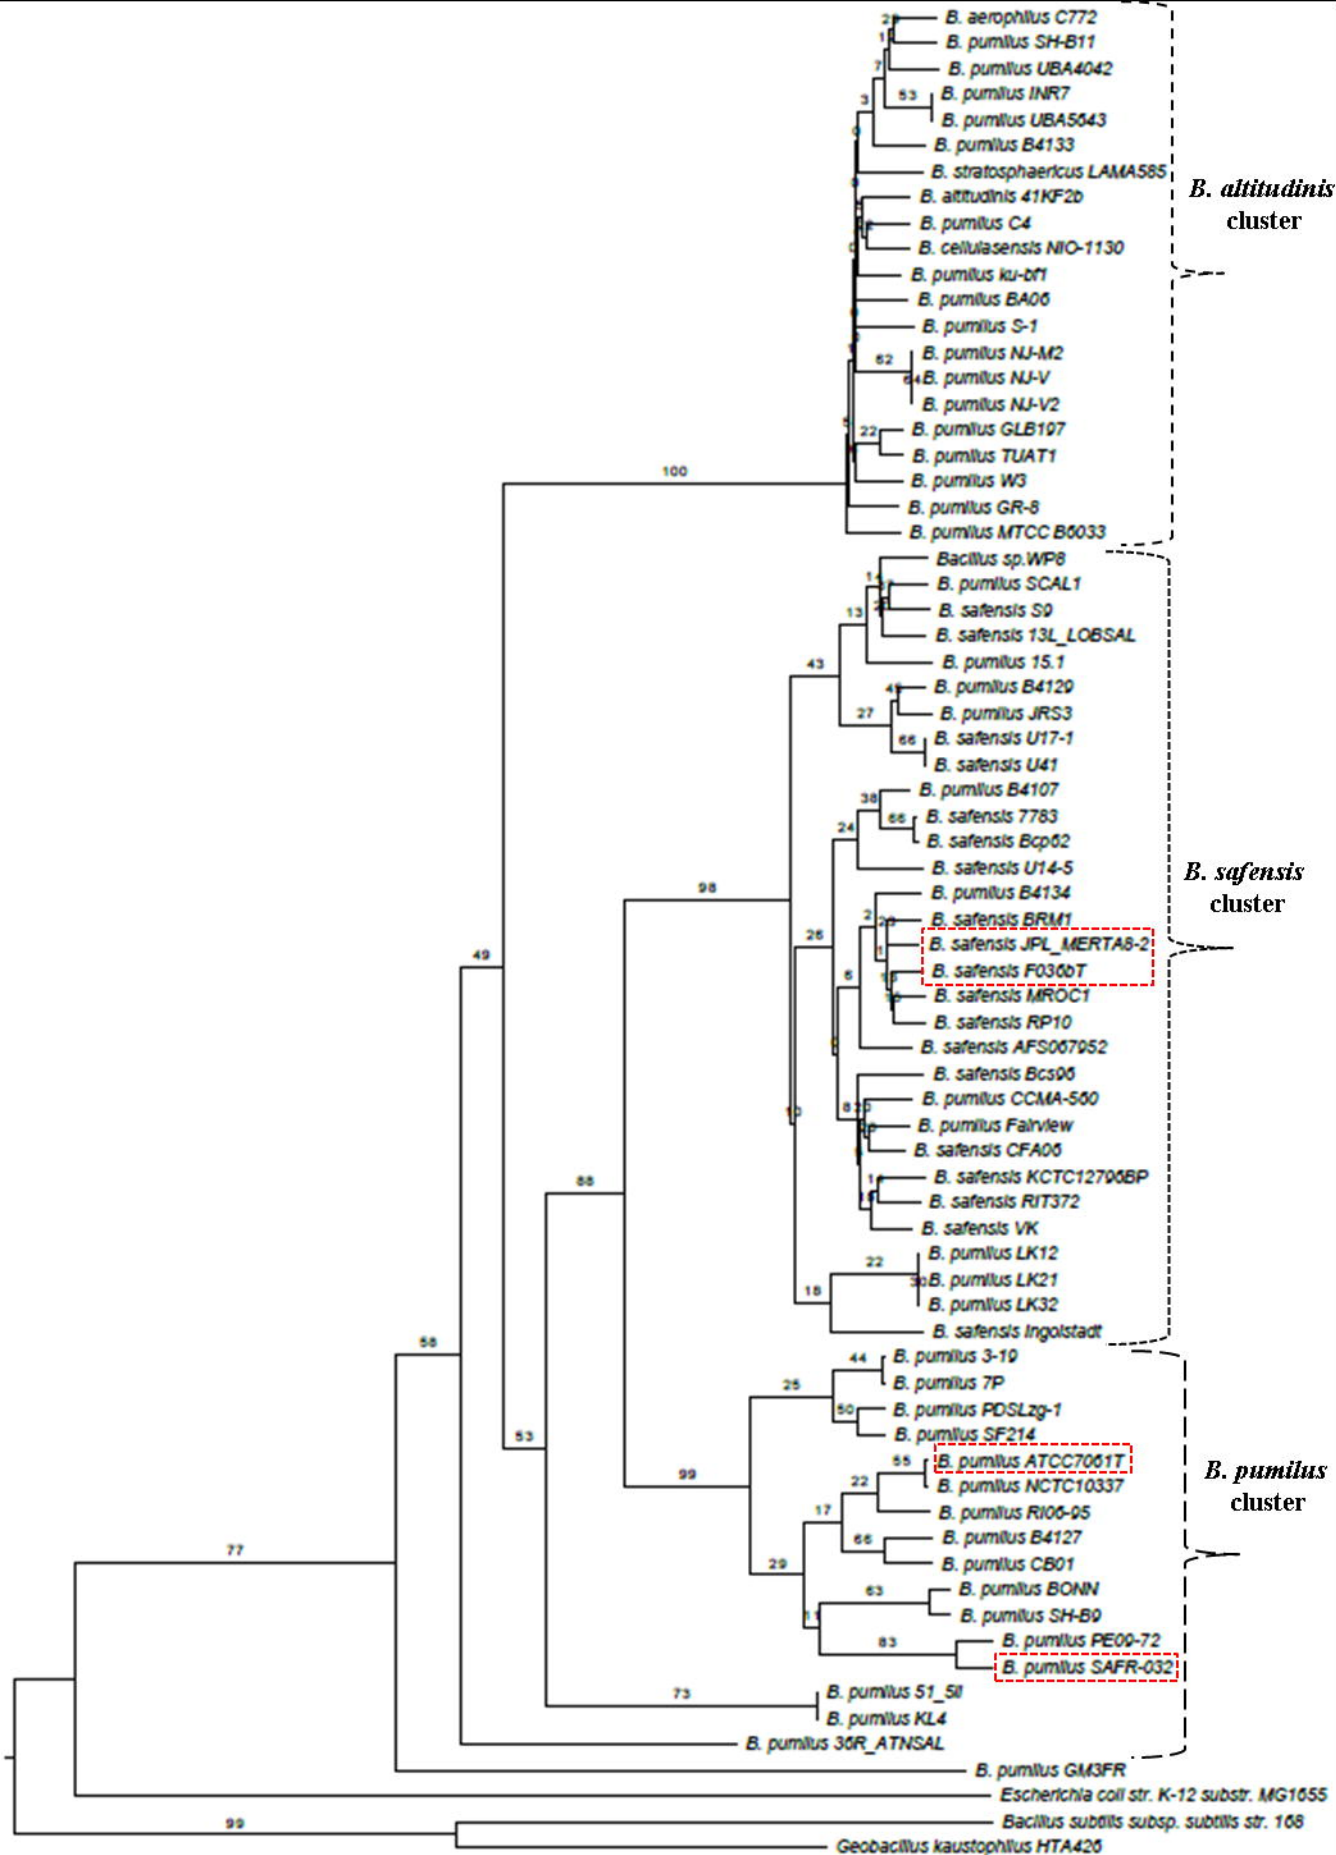

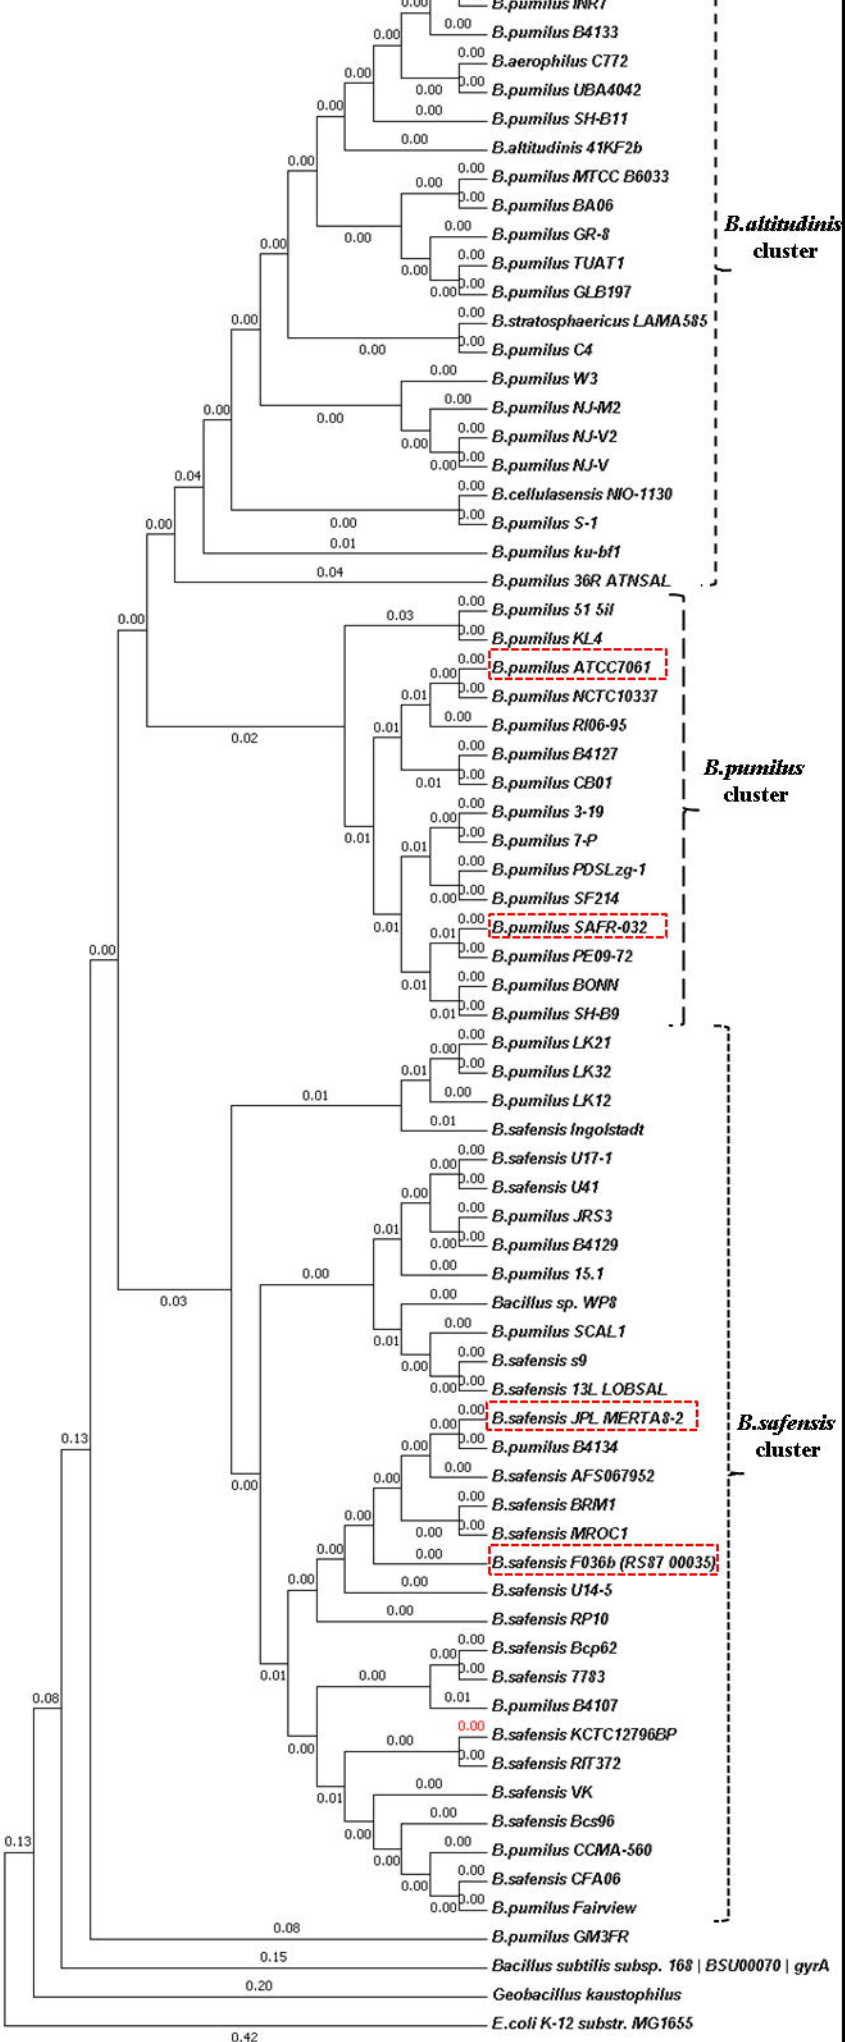

Source: http://biorxiv.org/content/10.1101/283937v2.full.pdf
